# 1 **Fetal liver macrophages contribute to the hematopoietic** 2 **stem cell niche by controlling granulopoiesis**

3 Amir Hossein Kayvanjoo<sup>1</sup>, Iva Splichalova<sup>1</sup>, David Alejandro Bejarano<sup>2</sup>, Hao Huang<sup>1</sup>,  
4 Katharina Mauel<sup>1</sup>, Nikola Makdissi<sup>1</sup>, David Heider<sup>1</sup>, Nora Reka Balzer<sup>1</sup>, Collins Osei-  
5 Sarpong<sup>3</sup>, Kevin Baßler<sup>4</sup>, Joachim L. Schultze<sup>4, 5, 6</sup>, Stefan Uderhardt<sup>7, 8</sup>, Eva Kiermaier<sup>9</sup>, Marc  
6 Beyer<sup>3, 5, 6</sup>, Andreas Schlitzer<sup>2</sup>, Elvira Mass<sup>1\*</sup>

## 7 **Affiliations:**

8 <sup>1</sup> Developmental Biology of the Immune System, Life & Medical Sciences (LIMES) Institute,  
9 University of Bonn; 53115 Bonn, Germany

10 <sup>2</sup> Quantitative Systems Biology, Life & Medical Sciences (LIMES) Institute, University of  
11 Bonn; 53115 Bonn, Germany

12 <sup>3</sup> Immunogenomics & Neurodegeneration, Deutsches Zentrum für Neurodegenerative  
13 Erkrankungen (DZNE) e.V., Bonn, Germany

14 <sup>4</sup> Genomics & Immunoregulation, LIMES Institute, University of Bonn, Bonn, Germany

15 <sup>5</sup> Systems Medicine, Deutsches Zentrum für Neurodegenerative Erkrankungen (DZNE) e.V.,  
16 Bonn, Germany

17 <sup>6</sup> PRECISE Platform for Single Cell Genomics and Epigenomics, DZNE and University of  
18 Bonn, Bonn, Germany

19 <sup>7</sup> Deutsches Zentrum für Immuntherapie (DZI), Friedrich Alexander University Erlangen-  
20 Nuremberg and Universitätsklinikum Erlangen, Erlangen, Germany.

21 <sup>8</sup> Department of Internal Medicine 3-Rheumatology and Immunology, Friedrich Alexander  
22 University Erlangen-Nuremberg and Universitätsklinikum Erlangen, Erlangen, Germany.

23 <sup>9</sup> Immune and Tumor Biology, Life & Medical Sciences (LIMES) Institute, University of Bonn;  
24 53115 Bonn, Germany

25  
26 \*corresponding author: [elvira.mass@uni-bonn.de](mailto:elvira.mass@uni-bonn.de)  
27

## 28 **Abstract**

29 During embryogenesis, the fetal liver becomes the main hematopoietic organ, where stem  
30 and progenitor cells as well as immature and mature immune cells form an intricate cellular  
31 network. Hematopoietic stem cells (HSCs) reside in a specialized niche, which is essential  
32 for their proliferation and differentiation. However, the cellular and molecular determinants  
33 contributing to this fetal HSC niche remain largely unknown. Macrophages are the first  
34 differentiated hematopoietic cells found in the developing liver, where they are important for  
35 fetal erythropoiesis by promoting erythrocyte maturation and phagocytosing expelled nuclei.  
36 Yet, whether macrophages play a role in fetal hematopoiesis beyond serving as a niche for  
37 maturing erythroblasts remains elusive. Here, we investigate the heterogeneity of  
38 macrophage populations in the fetal liver to define their specific roles during hematopoiesis.  
39 Using a single-cell omics approach combined with spatial proteomics and genetic fate-  
40 mapping models, we found that fetal liver macrophages cluster into distinct yolk sac-derived

41 subpopulations and that long-term HSCs are interacting preferentially with one of the  
42 macrophage subpopulations. Fetal livers lacking macrophages show a delay in  
43 erythropoiesis and have an increased number of granulocytes, which can be attributed to  
44 transcriptional reprogramming and altered differentiation potential of long-term HSCs.  
45 Together, our data provide a detailed map of fetal liver macrophage subpopulations and  
46 implicate macrophages as part of the fetal HSC niche.

47

## 48 **Introduction**

49

50 Macrophages are found in all adult organs, where they perform essential functions during  
51 inflammatory responses as well as in tissue homeostasis, such as tissue remodelling,  
52 phagocytosis of apoptotic cells, and production of cytokines and growth factors. Work in mice  
53 showed that most macrophages originate from erythro-myeloid progenitors (EMPs) in the  
54 yolk sac and are long-lived, and that their maintenance in many adult tissues does not rely  
55 on definitive hematopoiesis (Gomez Perdiguero et al., 2015; Hoeffel et al., 2015; Mass,  
56 2018). All developing tissues are initially colonized by circulating pre-macrophages (pMacs),  
57 which immediately differentiate into tissue-specific macrophages (Mass et al., 2016;  
58 Stremmel et al., 2018), therefore, macrophages are an integral part of organogenesis.

59

60 In adult tissues, macrophages inhabit distinct anatomical niches within organs, e.g., the lung  
61 harbours alveolar and interstitial macrophage populations (Aegerter et al., 2022), while  
62 macrophages in the adult liver are divided into Kupffer cells, liver capsular, central vein and  
63 lipid-associated macrophages (Guilliams and Scott, 2022). Within these niches, resident  
64 macrophages adapt to their tissue environment and perform specific tasks to maintain organ  
65 function, such as mucus clearance by alveolar macrophages or phagocytosis of red blood  
66 cells by Kupffer cells. However, the role of macrophages in organ development and function  
67 as well as their heterogeneity during embryogenesis is less well understood.

68

69 One of the few well-known functions of fetal macrophages is their involvement in erythroblast  
70 maturation. In the fetal liver, erythroblastic island (EI) macrophages serve as niches for  
71 erythroblasts. During erythropoiesis, primitive and definitive erythroblasts directly interact  
72 with EI macrophages, where they undergo final steps of maturation, including expelling of  
73 their nucleus, which is phagocytosed by EI macrophages (Palis, 2017, 2014). Previous  
74 studies identified EI macrophage heterogeneity in the fetal liver at embryonic day  
75 (E)13.5/E14.5 (Li et al., 2019; Mukherjee et al., 2021; Seu et al., 2017). EI macrophages  
76 were shown to express different levels of cell adhesion proteins such as Vcam1, CD169, and  
77 CD163, as well as other proteins that are important for their function as EI niche (e.g., Epor,  
78 Klf1, EMP, DNasell), thereby promoting erythropoiesis (Li et al., 2019; Mariani et al., 2019;

79 May and Forrester, 2020; Mukherjee et al., 2021). In addition to erythropoiesis, the  
80 E13.5/E14.5 fetal liver is at the peak of hematopoiesis, providing a niche for the expansion  
81 and differentiation of other hematopoietic stem and progenitor cells (Lewis et al., 2021).  
82 Thus, the liver is a complex cellular interaction network where the role of macrophages in  
83 other hematopoietic developmental processes, such as myelopoiesis, is not fully understood.

84

85 Recent evidence suggests that one of the core macrophage functions is the support of stem  
86 and progenitor cell functionality in different tissues. For instance, pericryptal macrophages in  
87 the gut interact with epithelial progenitors, thereby promoting their proliferation and  
88 differentiation via Wnt, gp130, TLR4, or NOX1 signalling (Delfini et al., 2022). In the bone  
89 marrow, distinct macrophage subpopulations contribute directly and indirectly to the  
90 hematopoietic stem cell (HSC) niche. Osteoclasts are a highly specialized EMP-derived  
91 macrophage population responsible for bone resorption, whose function is necessary to  
92 generate the bone marrow and, thereby, the postnatal HSC niche (Jacome-Galarza et al.,  
93 2019). Co-culture experiments using different combinations of hematopoietic cells indicate  
94 that osteomacs support the HSC niche in synergy with megakaryocytes (Mohamad et al.,  
95 2017). DARC<sup>+</sup> macrophages are in direct contact with CD82<sup>+</sup> long-term (LT)-HSCs in the  
96 endosteal and arteriolar niches, where they contribute to LT-HSC dormancy via maintenance  
97 of CD82 expression (Hur et al., 2016). Additional macrophage depletion studies via  
98 clodronate and diphtheria toxin indicate that CD169<sup>+</sup> macrophages in the bone marrow  
99 promote HSC retention by acting specifically on the Nestin<sup>+</sup> HSC niche (Chow et al., 2011),  
100 as well as steady-state and stress erythropoiesis (Chow et al., 2013).

101

102 During embryogenesis, macrophages have been shown to be important for the development  
103 and proliferation of hematopoietic stem- and progenitor cells in mice. In the mouse, the first  
104 HSCs develop from the aorta-gonad-mesonephros (AGM) region starting at E10.5. Here, a  
105 CD206<sup>+</sup> macrophage population actively interacts with nascent and emerging intra-aortic  
106 HSCs (Mariani et al., 2019). Macrophage depletion studies via clodronate liposomes and the  
107 Csf1r inhibitor BLZ945 using AGM explants indicate that the presence of macrophages in the  
108 AGM is influencing HSC production (Mariani et al., 2019). Furthermore, co-culture studies of  
109 a mixture of hematopoietic stem- and multipotent-progenitor cells (HSC/MPP) with  
110 macrophages isolated from the fetal liver as well as clodronate depletion studies during  
111 embryogenesis suggest that fetal liver macrophages promote HSC/MPP proliferation (Gao et  
112 al., 2021). Indeed, immunofluorescent stainings of F4/80<sup>+</sup> macrophages and CD150<sup>+</sup> cells  
113 (Gao et al., 2021) indicate that macrophages could also be part of the LT-HSC niche in the  
114 fetal liver, thereby influencing the proliferation and differentiation of stem cells at the top of  
115 the HSC hierarchy.

116

117 Studying stem cell niches and defining the molecular factors that promote stem cell  
118 proliferation and differentiation is essential to build a robust and reproducible *in vitro* system  
119 that may serve as a universal source of functional stem cells and/or immune cells for  
120 therapeutic purposes. This has already been achieved for induced pluripotent stem cells  
121 (iPSCs), which can be infinitely expanded and differentiated into the cell type of interest,  
122 thereby representing a safe product to treat diseases (Yamanaka, 2020). In contrast, a  
123 universal and well-defined culturing protocol for LT-HSCs allowing for continuous expansion  
124 is lacking (Kumar and Geiger, 2017; Wilkinson et al., 2020). Production of LT-HSCs from  
125 iPSCs represents a promising alternative, however, differentiation protocols without ectopic  
126 transcription factor expression have not been established yet (Demirci et al., 2020). This may  
127 be due to the complex developmental programming of adult LT-HSCs that have experienced  
128 distinct niche signals during their migration from AGM via the fetal liver to the bone marrow,  
129 resulting in functional differences observed in fetal versus mature HSCs (Arora et al., 2014).  
130 Growing evidence, mainly provided by *in vitro* and *ex vivo* studies in combination with  
131 macrophage depletion via clodronate (Gao et al., 2021; Mariani et al., 2019), suggests that  
132 macrophages play an essential role in HSC development and maintenance during  
133 embryogenesis. However, it remains to be investigated whether specific macrophage  
134 populations in the fetal liver contribute to LT-HSC stem-cell ness or differentiation via factors  
135 they produce *in vivo*.

136

137 Given the observations implicating macrophages in HSC functionality, we characterized the  
138 heterogeneity and ontogeny of fetal liver macrophage populations, providing a  
139 comprehensive macrophage atlas of the fetal liver at E14.5. Further, using a conditional  
140 mouse model to deplete macrophages *in vivo*, we established fetal liver macrophages as  
141 important modulators of LT-HSC differentiation capacity into granulocytes.

142

## 143 **Results**

### 144 *The fetal liver harbours heterogeneous macrophage populations*

145 To investigate fetal liver macrophage heterogeneity, we performed single-cell RNA-  
146 sequencing on sorted CD11b<sup>low/+</sup> cells at E14.5 (Figure S1A). To isolate macrophages and  
147 macrophage progenitors for further downstream analyses from this myeloid population, we  
148 clustered all cells and overlaid a pre-macrophage (pMac) signature (Mass et al., 2016). Out  
149 of eleven clusters, four clusters were chosen (Figure S1B, C, see Methods) and analysed  
150 further. To further select specifically macrophages, the same procedure was performed twice  
151 on the re-clustered cells using a signature enriched in fetal macrophages when compared  
152 with EMPs (Figure S1D), resulting in 18 clusters (Figure S1E). Cells that either expressed  
153 macrophage precursor genes (*Clec7a*, *Ccr2*, *Cx3cr1*, *Csf1r*), pan-macrophage genes (*Mrc1*,

154 *Adgre1*, *Siglec1*, *Msr1*, *Cd63*) and/or liver macrophage-specific genes (*Timd4*, *Clec4f*,  
155 *Vcam1*) were enriched in clusters 1, 2, 7, 8, 9, and 11, which were chosen for further  
156 downstream analysis (Figure 1A, B, S1F). The predominant expression of *Ly6c2*, *Ly6g*,  
157 *Cxcr2*, and *Cd33* in the remaining clusters (Figure S1F) indicated their monocyte/granulocyte  
158 or myelomonocytic precursor cell identity, respectively, and were therefore excluded from  
159 further analysis.

160

161 Cluster 9 expressed almost exclusively erythroblast-specific genes (*Hba-a2*, *Sptb*, *Trim10*,  
162 *Nxpe2*, *Snca*, *Epb42*) (Figure 1B, C) and was identified as E1 macrophages, which have  
163 been recently described as doublets of erythroblasts and macrophages (Popescu et al.,  
164 2019) or erythroblasts with cell remnants on their surface since macrophages frequently  
165 adhere to other cells (Millard et al., 2021). Clusters 7 and 8 showed the highest expression of  
166 bona fide macrophage genes such as *Csf1r*, *Mrc1*, and *Timd4* but were distinct in their  
167 expression of other macrophage markers (e.g., *Marco*, *Lyve1*) (Figure 1B, 1C, S1E). Cells in  
168 cluster 2 expressed the highest levels of *Ccr2*, *Clec7a*, *Clec4a*, *Il1b*, and *S100a6* (Figure 1B,  
169 C) besides some of the macrophage-specific genes, hinting towards an inflammatory state of  
170 this putative macrophage population. Clusters 1 and 11 showed a low expression of core  
171 macrophage genes compared to clusters 2, 7, and 8, suggesting a precursor stage (Figure  
172 1B). However, cluster 11 was distinct from cluster 1 with a high expression of granule-related  
173 genes, such as *Mpo*, *Elane*, and *Ctsg* (Figure 1C), which may indicate a granulocytic rather  
174 than a macrophage precursor state. To test these hypotheses and predict developmental  
175 trajectories, we performed a Partition-based graph abstraction (PAGA) analysis (Wolf et al.,  
176 2019) after excluding cluster 9 due to their doublet identity. Here, cluster 1 expression  
177 represents a progenitor state, thus, is the centre of the network, which was confirmed by  
178 pseudotime analysis (Figure 1D). The other clusters fall into distinct nodes, with clusters 7  
179 and 8 showing substantial similarity as indicated by the edge thickness (Figure 1D). In  
180 summary, our scRNA-seq analysis indicates the presence of at least three macrophage  
181 states (clusters 2, 7, and 8), which have distinct phenotypes.

182

183 To validate macrophage heterogeneity on the protein level, we performed a high-dimensional  
184 flow cytometry analysis on CD11b<sup>low/+</sup> cells (Figure S2A). Similar to the scRNA-seq  
185 enrichment, we visualised all myeloid cells using UMAP, clustered them, and overlaid a  
186 macrophage signature (*F4/80*, *Tim4*, *Cx3cr1*, *Vcam1*, *CD169*, *CD206*, Figure S2B). This  
187 resulted in seven clusters, which we analysed further (Figure 1E). Hierarchical clustering of  
188 all clusters expressing macrophage and macrophage precursor proteins confirmed the  
189 presence of three *F4/80*<sup>high</sup> macrophage populations (clusters A-C, Figure 1F). As already  
190 observed on the transcriptional level, cluster D likely represents Ter119<sup>+</sup> erythroblasts with

191 macrophage cell remnants, as indicated by the increased cell size and granularity  
192 determined via FSC and SSC, respectively (Figure 1F). To correlate precursor and  
193 macrophage clusters identified by transcriptional and protein analyses, a correlation matrix  
194 between the scRNA-seq and flow cytometry data sets was calculated based on gene  
195 expression corresponding to the presence of the respective antigen used in our flow  
196 cytometry panel (Figure 1G). Here, scRNA-seq precursor clusters 1 and 11 corresponded  
197 highly to clusters F and G, which expressed high levels of CD45, CD115 and Clec4f but were  
198 low in F4/80 and Tim4 expression. In contrast, scRNA-seq clusters 2 and 7 represented  
199 cluster A while cluster 8 correlated mostly with clusters B and C, supporting the notion of  
200 three distinct macrophage populations in the fetal liver at E14.5, in addition to E1  
201 macrophages.

202

### 203 Fetal liver macrophages originate from yolk-sac progenitors

204 Next, we addressed the ontogeny of the macrophage clusters using *Rosa26<sup>LSL-YFP</sup>* mice  
205 crossed to *Tnfrsf11a<sup>Cre</sup>* for detection of pMac-derived cells (Mass et al., 2016), to *Ms4a3<sup>Cre</sup>*  
206 for detection of monocyte-derived cells (Liu et al., 2019) and to the inducible *Cxcr4<sup>CreERT</sup>* with  
207 4-hydroxytamoxifen injection at E10.5 labelling all cells of the definitive hematopoiesis wave  
208 (Werner et al., 2020). We confirmed the presence of all three macrophage clusters and the  
209 Ter119<sup>+</sup> E1 macrophage cluster in all mouse models (Figure S2C). HSC-derived definitive  
210 erythroblasts in cluster D were efficiently fate-mapped using the *Cxcr4<sup>CreERT</sup>* model, validating  
211 that these were cell doublets or erythroblasts with cell remnants on their surface since they  
212 also showed low labelling of the other fate-mapping models that label  
213 macrophages/monocytes (Figure 1H). The remaining clusters were YFP<sup>+</sup> only in the  
214 *Tnfrsf11a<sup>Cre</sup>* model, demonstrating that all fetal liver macrophages at E14.5 derive from  
215 pMacs. Using the distinct expression of Vcam1, CD206 and CD169 in clusters A-C and their  
216 difference in cell size allowed us to develop a simple gating strategy to distinguish these  
217 macrophage populations (Figure 1I). In summary, using a hypothesis-driven analysis of  
218 CD11b<sup>low/+</sup> cells, we define, in addition to the already well-known E1 macrophage population,  
219 distinct macrophage populations in the fetal liver that are yolk sac-derived.

220

### 221 Fetal liver macrophage subpopulations display distinct transcriptional programs

222 Next, we set out to investigate whether the macrophage heterogeneity we defined at E14.5  
223 could indicate additional macrophage states besides serving as E1 macrophages, therefore,  
224 resulting in other functions than phagocytosing erythroblast nuclei. To this end, we first  
225 performed a GO term analysis on the top expressed 100 genes, comparing each cluster from  
226 the scRNA-seq analysis to all other clusters. Here, cluster 2-specific genes fell into the terms  
227 'cell chemotaxis', 'positive regulation of inflammatory response', and 'cytokine-mediated

228 signaling pathway' (Figure 2A), indicating the activated inflammatory state already observed  
229 in the top five expressed genes (Figure 1C). In contrast, cluster 7-related genes were  
230 significant for the GO terms 'positive regulation of lipid localization', 'ameboidal-type cell  
231 migration', and 'apoptotic cell clearance'. Also cluster 8 expressed genes belonging to the  
232 GO term "positive regulation of lipid localization' that partially overlapped with cluster 7 (e.g.,  
233 *ApoE*, *Lpl*) (Table S1). Additional cluster 8-specific terms were 'macrophage activation' and  
234 'cell junction disassembly' (Figure 2A). This analysis indicated that, albeit somewhat similar,  
235 the distinct macrophage populations might exert distinct functions in the fetal liver. This was  
236 confirmed by the cluster-specific expression of selected ligands indicating that the distinct  
237 cellular states may result in distinct paracrine signalling activity (Figure 2B). Intersecting the  
238 CellTalk database information (Shao et al., 2021) with the complete set of genes expressed  
239 by the three macrophage states revealed 208 potential macrophage-derived secreted ligands  
240 (Table S2).

241 We next used the 208 ligand candidates and performed a Gene Set Enrichment Analysis,  
242 and visualized the gene/GO-term relationships in a network (Figure 2C). This analysis  
243 pointed to additional functionality of the three macrophage states beyond erythropoiesis,  
244 which included regulation of hemopoiesis and stem cell development together with  
245 chemotaxis and vasculature development, mechanisms that could shape the stem cell niche.

246  
247 Macrophages contribute to the stem cell niche, particularly in the bone marrow, under  
248 inflammatory conditions (Seyfried et al., 2020). Yet, evidence for macrophage-derived  
249 molecules involved in the direct cell crosstalk controlling stem cell maintenance and  
250 differentiation in the mouse fetal liver is missing. Therefore, we sought to explore potential  
251 signalling events between macrophages and HSCs to determine whether macrophage-  
252 derived factors might modify HSC function during steady-state. Thus, we sequenced LT-HSC  
253 at E14.5 and, leveraging our scRNA-seq macrophage dataset (see Methods), uncovered  
254 potential ligand-receptor interactions between macrophage-derived ligands and LT-HSCs in  
255 the fetal liver (Figure 2D). Many of the ligands are well-known players in the stem cell niche,  
256 e.g., *Kitl*, *Igf1*, *Tnf*, *Tgfb1*, and *Fn1*, which have been reported to directly or indirectly promote  
257 the expansion of hematopoietic stem and progenitor cells (Azzoni et al., 2018; Hadland et al.,  
258 2022; Sakaki-Yumoto et al., 2013). In summary, our transcriptomic ligand-receptor  
259 interaction analyses suggest that macrophages express HSC niche factors and, thereby,  
260 may actively contribute to LT-HSC functionality in the fetal liver.

261

### 262 *Macrophages interact directly with LT-HSCs*

263 We next asked whether the potential paracrine signalling between macrophages and LT-  
264 HSCs in the fetal liver occurs via direct interaction. To test this, we first performed 3D whole-

265 mount immunofluorescence analyses in E14.5 livers. We found EI macrophages that were  
266 entirely surrounded by Ter119<sup>+</sup> erythroblasts, as expected, but frequently observed cell-cell  
267 interactions of macrophages with c-Kit<sup>+</sup> progenitors and CD150<sup>+</sup> LT-HSCs (Figure 3A). To  
268 determine whether LT-HSCs interact with distinct macrophage populations, we assessed  
269 cellular interactions via co-detection by indexing (CODEX)-enabled high-dimensional imaging  
270 (Black et al., 2021; Frede et al., 2022; Goltsev et al., 2018), validating the presence of  
271 clusters A-D identified by flow cytometry. CD45, Iba1, F4/80, Cx3cr1 and Tim4 were used as  
272 pan-macrophage markers (Figure 3B), allowing the distinction of cluster A: CD106 (Vcam1)<sup>+</sup>  
273 macrophages, cluster B: CD206<sup>+</sup> macrophages, cluster C: CD169<sup>+</sup> macrophages and the  
274 most abundant cluster D: Ter119<sup>+</sup> EI macrophages (Figure 3B, Figure S3A). First, we  
275 assessed the distribution of the four macrophage clusters in the different liver lobes using a  
276 Voronoi diagram, showing that all macrophages are found across the whole tissue (Figure  
277 3C). CD150<sup>+</sup> HSC were also dispersed across the fetal liver but showed a preferential  
278 localization near the liver capsule (Figure 3C). Similar results were detected via spatially  
279 segmented cellular neighbourhoods of the single objects using a raster scan with a radius of  
280 50 µm and a self-organizing map (SOM) algorithm where CD150<sup>+</sup> HSCs, represented by  
281 neighbourhood 4, were mainly found near the liver capsules of the lower left and the two  
282 upper liver lobes (Figure S3B). Next, we used a data-driven approach to detect spatial  
283 interactions between macrophage clusters and HSCs within a range of 5 to 50 µm.  
284 Interestingly, LT-HSCs showed the highest correlation with macrophages from cluster C  
285 representing CD169<sup>+</sup> macrophages (Figure 3D) and the lowest correlation with cluster D  
286 (Ter119<sup>+</sup> macrophages). Manual inspection of cells surrounding CD150<sup>+</sup> HSC in a 50 µm  
287 radius also revealed that LT-HSCs were preferentially surrounded by CD169<sup>+</sup> macrophages  
288 (cluster C, Figure 3E), with fewer identified cells belonging to the other macrophage  
289 populations (Figure 3F).

290 As erythroblasts are the most abundant cell type, we asked whether clusters A-C  
291 serve, at least partially, as EI macrophages. To this end, 50 macrophages of each cluster  
292 were randomly chosen, and the direct interaction with Ter119<sup>+</sup> cells was evaluated manually.  
293 While cells belonging to cluster D (Ter119<sup>+</sup> EI macrophages) showed 100 % interaction, as  
294 expected, cluster A (CD106<sup>+</sup> macrophages, 73 % interaction), cluster B (CD206<sup>+</sup>  
295 macrophages, 80 % interaction), and cluster C (CD169<sup>+</sup> macrophages, 80.4 % interaction)  
296 did not always interact with Ter119<sup>+</sup> erythroblasts (Figure S3C, D). The CD206<sup>+</sup> cluster A  
297 was the subpopulation with the least interaction and longest distance to the nearest  
298 erythroblast (Figure S3E), which was often accompanied by an elongated cell shape near  
299 vessels, indicating the presence of CD206<sup>+</sup> perivascular macrophages (Figure 3B). Of note,  
300 the tissue analysed via CODEX represents only cellular neighbourhoods in X and Y due to  
301 the thin sectioning technique (5 µm) and, thus, does not take neighbouring cells in the Z



302 plane into account. This leads to an underestimation of macrophage-HSC interactions, as  
303 indicated by F4/80<sup>+</sup> filopodia extending towards CD150<sup>+</sup> cells in almost all cases (Figure 3E).  
304 In summary, our data indicate that macrophages inhabit distinct niches within the fetal liver,  
305 with the majority of macrophages supporting mainly erythroblast maturation, while other  
306 populations may support HSC function.

307

### 308 Lack of macrophages leads to decreased erythrocyte maturation

309 Given that LT-HSCs have direct contact with or are in close proximity to macrophages  
310 providing niche signals, we hypothesised that depletion of fetal liver macrophages would  
311 alter the LT-HSC phenotype and function. Therefore, we took advantage of the *Tnfrsf11a*<sup>Cre/+</sup>;  
312 *Spi1*<sup>ff</sup> mouse model, which should lead to a depletion of fetal macrophages since *Tnfrsf11a*  
313 is expressed by pMacs (Mass et al., 2016) and *Spi1* (also known as *Pu.1*) is required for  
314 macrophage differentiation (McKercher et al., 1996; Scott et al., 1994). Indeed, flow  
315 cytometry and immunostaining revealed an 80-90 % reduction of F4/80<sup>+</sup>/Iba1<sup>+</sup> cells in fetal  
316 livers of *Tnfrsf11a*<sup>Cre/+</sup>;*Spi1*<sup>ff</sup> embryos compared to littermate controls demonstrating efficient  
317 depletion of macrophages (Figure 4A, B). First, we analysed the absolute cell numbers and  
318 the number of CD45<sup>+</sup> cells per fetal liver (Figure 4C), to ensure that our depletion strategy did  
319 not have any major off-targets leading to a developmental delay. The lack of an overall  
320 change of tissue architecture was confirmed by a haematoxylin-eosin staining (Figure 4D).  
321 Erythroblast maturation is characterized by changes in CD71 and Ter119 expression,  
322 allowing us to determine their developmental sequence within six subsets (from S0 to S5)  
323 (Fraser et al., 2007; Pop et al., 2010). The final maturation step of enucleation to produce a  
324 functional erythrocyte depends on EI macrophages (Palis, 2014). Indeed, Giemsa staining of  
325 blood smear samples from *Tnfrsf11a*<sup>Cre/+</sup>;*Spi1*<sup>ff</sup> knockout embryos showed a reduction of  
326 enucleated erythrocytes compared to controls (Figure 4E). However, the maturation of  
327 erythroblasts was not altered (Figure 4F). These results suggest that our newly developed  
328 mouse model efficiently targets fetal liver macrophages at E14.5, leading to a delayed  
329 erythrocyte enucleation, consistent with the function of EI macrophages.

330

### 331 Depletion of macrophages leads to transcriptional changes in HSCs

332 To determine whether the lack of macrophages would impact LT-HSC functionality, we  
333 performed bulk RNA-sequencing on sorted LT-HSCs from *Tnfrsf11a*<sup>Cre/+</sup>;*Spi1*<sup>ff</sup> knockout  
334 embryos and littermate controls at E14.5 (Figure S4A). Analysis of differentially expressed  
335 genes (DEG) resulted in 598 upregulated and 555 downregulated genes (Figure 5A, S4B,  
336 Table S3). Some of the upregulated genes were well-known transcriptional regulators of  
337 hematopoietic specification and stem cell capacity, such as *Gata2* and *Gata3*. (Figure 5A,  
338 S4C). Examining Gene Ontology (GO) pathways of these DEG revealed signalling

339 mechanisms enriched for metabolic processes, organelle localization and RNA-related  
340 processes to be downregulated (Figure 5B, Table S4). In contrast, genes belonging to the  
341 GO terms chromatin organization, myeloid cell differentiation, regulation of hemopoiesis and  
342 mononuclear cell proliferation were upregulated (Figure 5B, S4C). These data indicate that  
343 the transcriptional program of LT-HSC is regulated by macrophages and, thereby, may  
344 impact their proliferative and/or differentiation potential.

345

#### 346 Depletion of macrophages does not change stem and progenitor cell numbers

347 To assess LT-HSC maintenance, retention and proliferation in the fetal liver, we first  
348 performed flow cytometry experiments to quantify stem and progenitor cell numbers (gating  
349 strategy Figure S5A). Quantification of LT-HSCs, short-term (ST)-HSCs, multipotent  
350 progenitors (MPP) 2, MPP3, and MPP4 did not reveal any significant differences between  
351 *Tnfrsf11a<sup>Cre/+</sup>; Spi1<sup>ff</sup>* knockout embryos and littermate controls at E14.5 (Figure 5C). Further  
352 downstream progenitors, such as the common lymphoid progenitor (CLP), common myeloid  
353 progenitor (CMP), megakaryocyte-erythroid progenitor (MEP) and granulocyte-macrophage  
354 progenitor (GMP), were not significantly altered in cell numbers, albeit there was a tendency  
355 for increased GMP numbers in *Tnfrsf11a<sup>Cre/+</sup>; Spi1<sup>ff</sup>* knockout livers (Figure 5D). To address  
356 the proliferation capacity of HSCs, we sorted single LT-HSCs from *Tnfrsf11a<sup>Cre/+</sup>; Spi1<sup>ff</sup>* and  
357 littermate controls and monitored their proliferation 48 hours later (Figure 5E). Further, we  
358 performed serial colony-forming unit (CFU) assays to study the long-term self-renewal ability  
359 (Figure 5F). In both assays, *Tnfrsf11a<sup>Cre/+</sup>; Spi1<sup>ff</sup>* stem cells showed no defects or increase in  
360 proliferation compared to littermate controls (Figure 5C, D). These results suggest that a  
361 reduction of macrophages in the HSC niche does not modify stem and progenitor cell  
362 numbers or lead to a dysregulated proliferation capacity of LT-HSCs.

363

#### 364 Macrophages control HSC differentiation potential

365 Next, we addressed the differentiation behaviour of HSCs *in vivo* and *in vitro*. Using flow  
366 cytometry, we focused on myeloid cells since genes important for myeloid cell differentiation  
367 were upregulated (Figure 5B, S4C). An unbiased clustering of cells using UMAP indicated a  
368 reduction of F4/80<sup>+</sup> macrophage clusters A-C, but not of cluster D (Figure 6A), which again  
369 underlines the fact that these F4/80<sup>+</sup>Ter119<sup>+</sup> events represent cell doublets or erythroblasts  
370 with attached macrophage cell remnants. In addition to a Ly6G<sup>+</sup> neutrophil cluster, we  
371 detected two Ly6C<sup>+</sup> monocyte clusters that were distinguished by their Cx3cr1 expression.  
372 Using a gating strategy to detect these myeloid cell types (Figure S5B), we observed a  
373 significant increase of Ly6G<sup>+</sup> cells in *Tnfrsf11a<sup>Cre/+</sup>; Spi1<sup>ff</sup>* compared to littermate controls  
374 while the number of monocytes was not altered (Figure 6B). To test whether the change in  
375 differentiation potential of *Tnfrsf11a<sup>Cre/+</sup>; Spi1<sup>ff</sup>* HSCs is cell-autonomous, we performed a

376 CFU-C assay. While the total number of colonies was similar in both genotypes, the number  
377 of CFU-granulocyte/macrophage (GM) was increased (Figure 6C). Together with the results  
378 from the RNA-seq analyses, our data indicate that the lack of fetal liver macrophages causes  
379 a reprogramming of LT-HSCs, leading to their preferential differentiation towards the  
380 granulocytic lineage.

381

## 382 **Discussion**

383

384 We have shown that liver macrophages at E14.5 are heterogenous and that they play an  
385 active role in the niche of CD150<sup>+</sup> LT-HSCs. While most macrophages serve purely as EI  
386 macrophages, being only surrounded by Ter119<sup>+</sup> erythroblasts and promoting erythroblast  
387 maturation, a subset of macrophages directly interacts with other cells, such as c-Kit<sup>+</sup> and  
388 CD150<sup>+</sup> stem and progenitor cells. Being part of the HSCs niche, macrophages seem to  
389 specifically control the production of neutrophils, likely via paracrine factors that imprint the  
390 tissue environment on LT-HSCs, thereby enabling a tight balance of hematopoietic cell  
391 numbers. Using various fate-mapping models, we could exclude any contribution of definitive  
392 hematopoietic stem cells to the fetal liver macrophage pool. Finally, we provide a simple  
393 gating strategy with commonly available antibodies that allow the identification of  
394 macrophage subpopulations and the discrimination from cell doublets.

395

396 CODEX analyses indicate that CD150<sup>+</sup> LT-HSCs are preferentially found in close proximity to  
397 CD169<sup>+</sup> macrophages. CD169, also known as sialoadhesin, is a cell adhesion protein that  
398 has been described as an EI macrophage marker in the bone marrow and the fetal liver  
399 (Chow et al., 2013, 2011; Li et al., 2019; Seu et al., 2017), albeit with varying expression  
400 patterns (Seu et al., 2017). In line with this, our flow cytometry and *in situ* immunofluorescent  
401 CODEX analysis of the fetal liver indicates that the majority of macrophages express CD169,  
402 with few macrophages that are CD169-negative and small in size but that express high levels  
403 of F4/80, Tim4 and Vcam1, and can thus be considered *bona fide* macrophages (cluster A).  
404 CD169 has been further defined as essential for erythropoiesis by promoting erythroblast  
405 maturation in the bone marrow (Chow et al., 2013). Intriguingly, CD169 is not required to  
406 bind erythroblasts, as shown by studies using specific inhibitors (Morris et al., 1991, 1988),  
407 but instead accumulates in contact zones between macrophages and immature granulocytes  
408 (Crocker et al., 1990). However, these studies, as many others analysing EI macrophages,  
409 were performed after flushing the bone marrow. Thus, an ultrastructural characterization of  
410 the fetal liver *in situ* may be helpful in addressing whether CD169 forms clusters in the  
411 plasma membrane, which may be a direct interaction zone between CD169<sup>+</sup> macrophages

412 and LT-HSCs. However, since CD150<sup>+</sup> LT-HSCs also interacted with CD169<sup>+</sup> macrophages,  
413 the tethering mechanism may rely on another surface receptor altogether.

414

415 Recent studies have addressed the role of fetal macrophages in the development of  
416 hematopoietic stem and progenitor cells. Work in zebrafish shows a homing and retention  
417 mechanism controlled by macrophages (Li et al., 2018; Theodore et al., 2017). Li et al.  
418 describe a Vcam1<sup>+</sup> macrophage-like cell population that interacts with hematopoietic stem  
419 and progenitor cells (HSPCs) and serves as a permissive signal for HSPC entry into the  
420 embryonic caudal haematopoietic tissue (CHT) niche (Li et al., 2018). Yet, our work does not  
421 support an essential role of macrophages for LT-HSC homing or retention to the fetal liver  
422 since numbers of LT-HSC are not affected in *Tnfrsf11a*<sup>Cre/+</sup>; *Spi1*<sup>ff</sup> embryos. Work in mouse  
423 embryos indicates that CD206<sup>+</sup> macrophages in the AGM contribute to intra-aortic HSC  
424 generation and maturation (Mariani et al., 2019). Further, macrophages have been  
425 suggested to promote HSC/MPP proliferation in the fetal liver (Gao et al., 2021). However,  
426 due to the lack of genetic mouse models targeting only yolk sac-derived macrophages and  
427 not the definitive wave of hematopoiesis, these studies relied on macrophage depletion via  
428 clodronate liposomes and the Csf1r inhibitor BLZ945 (Gao et al., 2021; Mariani et al., 2019).  
429 Thus, the long-term impact of these substances on the proliferation capacity of HSCs or  
430 other niche cells that promote HSC development cannot be excluded. Indeed, our model, in  
431 which we target pMacs very efficiently using the *Tnfrsf11a*<sup>Cre</sup> mouse model (Mass et al.,  
432 2016), leading to an almost complete depletion of macrophages while HSCs remain wildtype,  
433 we do not observe any defects in the proliferation and expansion of HSCs arguing for an  
434 unspecific off-target effect of clodronate and BLZ945.

435

436 During steady-state adulthood, macrophages have been shown to control neutrophil  
437 numbers through the clearance of apoptotic neutrophils and via the G-CSF/IL-17/IL-23  
438 cytokine axis, which promotes granulopoiesis (Gordy et al., 2011; Hong et al., 2012; Stark et  
439 al., 2005). The reduction of macrophage populations in the bone marrow and spleen  
440 observed in *LysM*<sup>Cre</sup>; *c-Flip*<sup>ff</sup> mice led to neutrophilia during steady state, which was attributed  
441 to the defect in efferocytosis of apoptotic neutrophils (Gordy et al., 2011). Furthermore, the  
442 *LysM*<sup>Cre</sup>; *c-Flip*<sup>ff</sup> model is also defined by an increase of inflammatory monocytes in the blood  
443 and spleen, indicating an alteration of myeloid progenitors leading to increased numbers of  
444 neutrophils and monocytes, likely driven by increased levels of G-CSF (Gordy et al., 2011).  
445 In contrast, the maintenance and longevity of neutrophils during embryogenesis are less well  
446 understood. Yet, published work suggests a different life span of fetal and adult neutrophils,  
447 with the E14.5 fetal liver harbouring only a few apoptotic cells (Liu et al., 2010) in comparison  
448 to the adult spleen analysed in *LysM*<sup>Cre</sup>; *c-Flip*<sup>ff</sup> mice and littermate controls (Gordy et al.,

449 2011). Indeed, circulating neutrophils at E16.5 can be fate-mapped to an E8.5 yolk sac  
450 progenitor (Gomez Perdiguero et al., 2015), and during embryogenesis, there is rather a  
451 massive increase of neutrophils between E14.5 and E16.5 (Freyer et al., 2021) (and own  
452 data, not shown) instead of the steady-state turnover observed in adult mice. Thus,  
453 increased numbers of neutrophils in the fetal liver of *Tnfrsf11a<sup>Cre/+</sup>; Spi1<sup>fl/fl</sup>* embryos are  
454 unlikely caused by an increase of apoptotic neutrophils not being phagocytosed by  
455 macrophages.

456

457 Our RNA-seq data instead indicate that there is a transcriptional change in LT-HSCs when  
458 macrophages are lacking, supporting the hypothesis that fetal liver macrophages provide not  
459 only a niche for erythroblasts but also for LT-HSCs. In LT-HSC from *Tnfrsf11a<sup>Cre/+</sup>; Spi1<sup>fl/fl</sup>*  
460 fetal livers *Gata2* and *Gata3* were upregulated compared to littermate controls. Previous  
461 studies have shown the importance of *Gata2* and *Gata3* transcription factors in  
462 hematopoiesis (Alsayegh et al., 2019). GATA2 serves as a regulator of genes controlling the  
463 proliferative capacity of early haematopoietic cells during embryogenesis (Tsai et al., 1994;  
464 Tsai and Orkin, 1997) and the GMP cell fate (Rodrigues et al., 2008). Here, gene dosage is  
465 also crucial for HSC functionality since *Gata2* heterozygote (*Gata2<sup>+/-</sup>*) mice displayed  
466 reduced GMP numbers in the bone marrow and serial replating CFU assays of *Gata2<sup>+/-</sup>* bone  
467 marrow produced less granulocyte-macrophage progenitors compared to controls  
468 (Rodrigues et al., 2008). Further, a study in GATA2-deficient human embryonic stem cells  
469 could show that GATA2 is required for the production of granulocytes (Huang et al., 2015).  
470 These data highlight the conserved function of *Gata2* in regulating HSC functionality on  
471 different levels, including their differentiation into granulocytes. Similar to *Gata2*, *Gata3* can  
472 also regulate HSC maintenance and differentiation. Different studies of fetal and adult HSCs  
473 demonstrated that *Gata3* is required for maintaining the self-renewing capacity of HSCs  
474 (Fitch et al., 2012; Frelin et al., 2013; Ku et al., 2012) and that expression of *Gata3* is tightly  
475 regulating LT-HSCs to either self-renew or differentiate (Frelin et al., 2013). We could not  
476 observe an impact of *Gata2/Gata3* upregulation on LT-HSC numbers or their  
477 proliferation/serial replating capacity, suggesting a different mechanism in fetal livers.  
478 However, dysregulation of *Gata2* and/or *Gata3* expression may cause increasing numbers of  
479 GMPs and significantly more neutrophils in the fetal liver observed in *Tnfrsf11a<sup>Cre/+</sup>; Spi1<sup>fl/fl</sup>*  
480 embryos. To define the LT-HSC niche in more detail, it will be important to examine whether  
481 macrophage-derived signals can control the expression and/or activity of *Gata2* and *Gata3* or  
482 other transcription factors that are known to control HSCs stem-cell ness and differentiation.

483

484 A study in zebrafish supports the notion of macrophage-HSC crosstalk requirement during  
485 development, uncovering a 'grooming' mechanism of embryonic macrophages that had a

486 long-lasting impact on adult stem cells: HSPCs in the CHT often completed a cell division  
487 shortly after macrophage interactions and lack of CHT macrophages led to a decreased  
488 HSPC clonality in the adult marrow (Wattrus et al., 2022). Interestingly, their data suggests  
489 that HSPC proliferation in the CHT is mediated through ERK/MAPK activity, which is  
490 controlled by macrophage-derived Il1b (Wattrus et al., 2022). Indeed, the scRNA-seq  
491 macrophage cluster 2 is specifically expressing Il1b and could have a similar effect on a  
492 subset of LT-HSCs in the mouse fetal liver. Therefore, dissecting the macrophage-derived  
493 ligands and their effect on HSPC populations on a single-cell level will shed light on the  
494 crosstalk mechanisms in mouse fetal livers in the future.

495

496 Defining factors that control the HSC niche is essential to support efforts for an *in vitro*  
497 expansion and targeted differentiation of HSCs. Only a few studies have focused on  
498 macrophages as HSC niche cells so far, as they are primarily viewed as interacting cells of  
499 erythroblasts in both the fetal liver and the adult bone marrow. Here, we show that  
500 macrophages provide a niche for LT-HSCs in the fetal liver, and that macrophage deficiency  
501 leads to changes in the LT-HSC transcriptional program and their differentiation capacity.  
502 Likely, not only the immediate interaction but also macrophage-derived cytokines and growth  
503 factors affect processes, such as fate decisions and stem-cell ness. Our results provide a  
504 starting point to study the impact of macrophage-derived signals on LT-HSC functionality  
505 during embryogenesis and adulthood.

506

507

## 508 **Figure legends**

509 **Figure 1. Characterization of fetal liver macrophage populations.** (A) Single-cell RNA-  
510 sequencing (scRNA-seq) analysis of wildtype CD11b<sup>low/+</sup> cells isolated from a fetal liver at  
511 developmental day (E)14.5. Clusters of possible macrophage subsets identified by a  
512 monocyte/macrophage signature (see Supplemental Figure 1) are visualized through UMAP.  
513 (B) Expression of selected macrophage- and macrophage progenitor-specific genes in  
514 clusters from (A). (C) Violin plots of highly expressed genes within the clusters from (A). (D)  
515 Developmental trajectory analysis using PAGA method (left) and pseudotime analysis (right)  
516 of the identified clusters in (A), excluding cluster 9. (E) Flow cytometry analysis of CD11b<sup>low/+</sup>  
517 cells with a macrophage signature, isolated from a fetal liver at developmental day E14.5.  
518 Cell surface marker expression was used to generate unbiased clusters using UMAP. (F)  
519 Heatmap of relative protein expression and cell size parameters used in the flow-cytometry  
520 analysis in (E). (G) Correlation matrix between the flow cytometry and scRNA-seq data  
521 reveals highly correlating clusters between the two datasets. (H) Flow-cytometry analysis of  
522 E14.5 fetal liver macrophages using three different fate-mapping mouse models. CD11b<sup>low/+</sup>

523 cells with a macrophage signature were analyzed as shown in (E, F), resulting in similar  
524 cluster distribution (see Supplemental Figure 2C). YFP<sup>+</sup> cells from the *Tnfrsf11a*<sup>Cre</sup>;  
525 *Rosa26*<sup>YFP</sup> model (green) indicate a yolk sac origin. *Ms4a3*<sup>Cre</sup>; *Rosa26*<sup>YFP</sup> (pink) and  
526 *Cxcr4*<sup>CreERT</sup>; *Rosa26*<sup>YFP</sup> with 4-hydroxytamoxifen (4-OHT) injection at E10.5 (grey) indicate a  
527 monocytic and hematopoietic stem cell origin, respectively. Circles represent individual mice.  
528 **(I)** Simplified gating strategy to identify macrophage clusters in E14.5 livers using flow  
529 cytometry.

530

531 **Figure 2. Transcriptional program and paracrine signalling of fetal liver macrophages.**

532 **(A)** Gene set enrichment analysis (GSEA) of final macrophage clusters 2, 7 and 8 was  
533 performed on the differentially expressed genes of each cluster. **(B)** Expression of selected  
534 ligands in the final macrophage clusters. **(C)** Interaction and functional network of expressed  
535 ligands on the identified macrophage clusters 2, 7 and 8. Each hub with a colour indicates  
536 the function of the ligands, while the edges show the interaction between them. **(D)** Potential  
537 ligand-receptor interactions between macrophages and LT-HSCs. The gene names on the  
538 bottom of the plot are expressed ligands in macrophage clusters 2, 7 and 8. Gene names on  
539 the top are expressed receptors on LT-HSCs at E14.5. Each ligand can target several  
540 receptors which are indicated with the same colour.

541

542 **Figure 3. Macrophage heterogeneity and their interaction with HSCs.**

543 Immunostaining of E14.5 fetal liver sections with antibodies against F4/80, c-Kit, Tim4,  
544 Ter119, and CD150. The first row visualizes the interaction between E1 macrophages  
545 surrounded by Ter119<sup>+</sup> erythroblasts. The second and last rows highlight the interaction  
546 between macrophages and progenitor cells, including CD150<sup>+</sup> LT-HSCs. The black arrows  
547 on the last row indicate the yz and xz dimensions which are shown on the left and bottom  
548 sides. **(B)** A 5 µm frozen section of a fetal liver from an E14.5 wildtype embryo was stained  
549 with a 20-plex CODEX antibody panel. Representative image of the entire field of view is  
550 shown in the upper panel. Enlargements showing representative images of the cells from  
551 clusters A-D are shown in the lower panel. Yellow arrows in the enlargements indicate  
552 macrophages from the corresponding cluster. Scale bars represent 500 µm in the overlay  
553 and 15 µm in the enlargements. **(C)** Voronoi diagram from (B) after manual cell classification  
554 using the HSCs, blood vessels, and cells from the four macrophage clusters as seeds. **(D)**  
555 Spatial analysis of interactions between cells from macrophage clusters, HSCs, and blood  
556 vessels in the fetal liver within a range of 5 to 50 µm. Values represent the calculated Log  
557 Odds Ratio. **(E)** Representative images of the interaction of HSCs with the macrophage  
558 clusters. Filled arrowheads indicate the HSC, and empty arrowheads indicate the  
559 macrophages from the corresponding cluster. Scale bar represents 15 µm. **(F)** Absolute

560 number of cells from the four macrophage clusters within a radius of 50  $\mu\text{m}$  from one  
561 randomly selected HSC. Each dot represents one cell. Black lines in the plot represent the  
562 mean. One-way ANOVA; \*  $p < 0.05$ , \*\*  $p < 0.01$ .

563

564 **Figure 4. The effect of macrophage depletion on erythropoiesis. (A)** Quantification of  
565 F4/80<sup>+</sup> macrophage cells in the E14.5 fetal liver of control and *Tnfrsf11a*<sup>Cre/+</sup>; *Spi1*<sup>ff</sup> knockout  
566 embryos using flow cytometry. n = 11 for *Tnfrsf11a*<sup>+/+</sup>; *Spi1*<sup>ff</sup>, n = 5 *Tnfrsf11a*<sup>Cre/+</sup>; *Spi1*<sup>ff</sup>. **(B)**  
567 Immunofluorescent staining of macrophages using Iba1 antibody in E14.5 livers.  
568 Representative for n = 3. Scale bar represents 30  $\mu\text{m}$ . **(C)** Quantification of single live and  
569 CD45<sup>+</sup> cells in the E14.5 fetal liver of control and *Tnfrsf11a*<sup>Cre/+</sup>; *Spi1*<sup>ff</sup> knockout embryos  
570 using flow cytometry. n = 11 for *Tnfrsf11a*<sup>+/+</sup>; *Spi1*<sup>ff</sup>, n = 5 *Tnfrsf11a*<sup>Cre/+</sup>; *Spi1*<sup>ff</sup>. **(D)**  
571 Haematoxylin and eosin stain (HE) of *Tnfrsf11a*<sup>+/+</sup>; *Spi1*<sup>ff</sup> and *Tnfrsf11a*<sup>Cre/+</sup>; *Spi1*<sup>ff</sup> fetal livers  
572 at E14.5. Representative for n = 5. Overviews were taken with a 5x objective, insets with a  
573 20x objective. **(E)** On the left: representative pictures of blood smear using May-Grünwald-  
574 Giemsa staining. Arrows indicate nucleated erythroblasts. On the right; the percentage of  
575 enucleated erythrocytes in the blood of *Tnfrsf11a*<sup>+/+</sup>; *Spi1*<sup>ff</sup> and *Tnfrsf11a*<sup>Cre/+</sup>; *Spi1*<sup>ff</sup> embryos  
576 at E14.5. n = 13 for *Tnfrsf11a*<sup>+/+</sup>; *Spi1*<sup>ff</sup> and n = 9 for *Tnfrsf11a*<sup>Cre/+</sup>; *Spi1*<sup>ff</sup>. **(F)** On the left:  
577 representative gating strategy to capture differentiation stages of erythrocytes. On the right:  
578 comparison of the erythrocyte's percentages in each of the differentiation stages between  
579 *Tnfrsf11a*<sup>+/+</sup>; *Spi1*<sup>ff</sup> and *Tnfrsf11a*<sup>Cre/+</sup>; *Spi1*<sup>ff</sup> embryos at E14.5. n = 11 for *Tnfrsf11a*<sup>+/+</sup>; *Spi1*<sup>ff</sup>  
580 and n = 5 for *Tnfrsf11a*<sup>Cre/+</sup>; *Spi1*<sup>ff</sup>. All statistical tests comparing control and *Tnfrsf11a*<sup>Cre/+</sup>;  
581 *Spi1*<sup>ff</sup> embryos: \*\*\*\* $P < 0.0001$ , \*\*\* $P < 0.001$ , \*\* $P < 0.01$ , and \* $P < 0.05$ , Wilcoxon test.

582

583 **Figure 5 The effect of macrophage depletion on haematopoiesis. (A)** Volcano plot of  
584 differentially expressed genes between CD150<sup>+</sup> LT-HSCs sorted from *Tnfrsf11a*<sup>+/+</sup>; *Spi1*<sup>ff</sup>  
585 (n = 4) and *Tnfrsf11a*<sup>Cre/+</sup>; *Spi1*<sup>ff</sup> (n = 6) embryos. Blue dots are significant (adjusted p-value  
586 < 0.1), red dots are significant with a fold-change of  $\pm 0.5$ . **(B)** Gene set enrichment analysis  
587 of significant up and down-regulated genes from (A) between the control and knockout  
588 embryos. **(C)** Quantification of the stem- and progenitor cells from *Tnfrsf11a*<sup>+/+</sup>; *Spi1*<sup>ff</sup> and  
589 *Tnfrsf11a*<sup>Cre/+</sup>; *Spi1*<sup>ff</sup> fetal livers at E14.5. LT-HSC: long-term hematopoietic stem cells; ST-  
590 HSC: short-term hematopoietic stem cells; MPP: multipotent progenitors. n = 6 for  
591 *Tnfrsf11a*<sup>+/+</sup>; *Spi1*<sup>ff</sup> and n = 5 for *Tnfrsf11a*<sup>Cre/+</sup>; *Spi1*<sup>ff</sup>. **(D)** Quantification of progenitors from  
592 *Tnfrsf11a*<sup>+/+</sup>; *Spi1*<sup>ff</sup> and *Tnfrsf11a*<sup>Cre/+</sup>; *Spi1*<sup>ff</sup> fetal livers at E14.5. n = 6 for *Tnfrsf11a*<sup>+/+</sup>; *Spi1*<sup>ff</sup>  
593 and n = 5 for *Tnfrsf11a*<sup>Cre/+</sup>; *Spi1*<sup>ff</sup>. CLP: common lymphoid progenitor; CMP: common  
594 myeloid progenitor; GMP: granulocyte-macrophage progenitor; MEP: megakaryocyte-  
595 erythrocyte progenitor. **(E)** Cell proliferation assay. LT-HSCs were harvested from the fetal  
596 liver at E14.5 using FACS for performing a single-cell colony assay. n = 77 LT-HSCs from



597 n = 5 fetal livers for *Tnfrsf11a*<sup>+/+</sup>; *Spi1*<sup>ff</sup> and n = 96 LT-HSCs from n = 5 fetal livers  
598 for *Tnfrsf11a*<sup>Cre/+</sup>; *Spi1*<sup>ff</sup>. **(F)** Serial transfer colony-forming assay showing the number of  
599 observed colonies after seeding E14.5 fetal liver cells into media (1<sup>st</sup> replicate) and re-  
600 seeding the cultured colonies (2<sup>nd</sup> replicate). n = 7 for *Tnfrsf11a*<sup>+/+</sup>; *Spi1*<sup>ff</sup> and n = 8  
601 for *Tnfrsf11a*<sup>Cre/+</sup>; *Spi1*<sup>ff</sup>.

602

603 **Figure 6. Macrophage depletion shifts haematopoiesis towards the granulocytic**  
604 **lineage. (A)** Flow cytometry analysis of CD11b<sup>low/+</sup> cells isolated from *Tnfrsf11a*<sup>+/+</sup>; *Spi1*<sup>ff</sup> and  
605 *Tnfrsf11a*<sup>Cre/+</sup>; *Spi1*<sup>ff</sup> fetal livers at E14.5. Cell surface marker expression was used to  
606 generate unbiased clusters using UMAP, which were subsequently used for a gating strategy  
607 to quantify respective populations. **(B)** Quantification of monocytes (Cx3cr1<sup>+</sup> and Cx3cr1<sup>-</sup>)  
608 and neutrophils progenitors from *Tnfrsf11a*<sup>+/+</sup>; *Spi1*<sup>ff</sup> and *Tnfrsf11a*<sup>Cre/+</sup>; *Spi1*<sup>ff</sup> fetal livers at  
609 E14.5. n = 11 for *Tnfrsf11a*<sup>+/+</sup>; *Spi1*<sup>ff</sup> and n = 5 for *Tnfrsf11a*<sup>Cre/+</sup>; *Spi1*<sup>ff</sup>. **(C)** Colony-forming  
610 unit assay from *Tnfrsf11a*<sup>+/+</sup>; *Spi1*<sup>ff</sup> and *Tnfrsf11a*<sup>Cre/+</sup>; *Spi1*<sup>ff</sup> fetal livers at E14.5. n = 4 for  
611 *Tnfrsf11a*<sup>+/+</sup>; *Spi1*<sup>ff</sup> and n = 5 for *Tnfrsf11a*<sup>Cre/+</sup>; *Spi1*<sup>ff</sup>. 2way ANOVA test. BFU: Burst-forming  
612 erythroid, E: erythroid; G granulocyte; GEMM; granulocyte, erythroid, macrophage,  
613 megakaryocyte; GM granulocyte, macrophage; M: macrophage.

614

#### 615 **Supplementary figure legends**

616 **Supplementary figure 1. Sorting and characterization of fetal liver myeloid cells. (A)**  
617 Sorting strategy of CD11b<sup>+</sup> cell for performing single-cell RNA-sequencing using wildtype  
618 E14.5 fetal livers. **(B)** Sub-clustering strategy of the single-cell clusters from all cells passing  
619 quality control. The initial clusters of interest were identified by projecting the pre-  
620 macrophage (pMac) signature on the single cells. **(C)** Top expressed genes from clusters in  
621 (B) to identify myeloid cell populations. **(D)** Sub-clustering strategy for the second and the  
622 third round of macrophage cluster selection. The initially selected clusters were analysed for  
623 a second time, and a set of signature genes upregulated in macrophages (M $\phi$ ) compared to  
624 erythro-myeloid progenitors (EMPs) were projected on them. The same procedure was  
625 repeated for a third time. **(E)** Clusters resulting from the third round of sub-setting. 18  
626 identified clusters were visualized using UMAP. **(F)** Expression of individual monocyte and  
627 macrophage-specific genes on the final identified clusters.

628 **Supplementary figure 2. Flow cytometry analysis of macrophage subpopulations and**  
629 **fate-mapping mouse models. (A)** Flow cytometry analysis of CD11b<sup>low/+</sup> cells with a  
630 macrophage signature, isolated from a fetal liver at developmental day E14.5. Cell surface  
631 marker expression was used to generate unbiased clusters using UMAP. **(B)** Projection of  
632 macrophage markers on the flow cytometry data using UMAP visualization. **(C)** Relative  
633 expression of markers used in the flow cytometry analysis of three different fate-mapping

634 mouse models. *Tnfrsf11a*: *Tnfrsf11a*<sup>Cre</sup>; *Rosa26*<sup>YFP</sup> model. *Ms4a3*: *Ms4a3*<sup>Cre</sup>; *Rosa26*<sup>YFP</sup>;  
635 *Cxcr4*: *Cxcr4*<sup>CreERT</sup>; *Rosa26*<sup>YFP</sup> with 4-hydroxytamoxifen (4-OHT) injection at E10.5. The  
636 identified macrophage clusters (A-D) shown in Figure 1F could be identified in all models  
637 with similar expression patterns.

638 **Supplementary figure 3. Spatial CODEX analyses of macrophage clusters in the fetal**  
639 **liver. (A)** Proportions of cells from the macrophage clusters within the total F4/80<sup>+</sup> Iba1<sup>+</sup>  
640 Cx3cr1<sup>+</sup> Tim4<sup>+</sup> macrophages from the CODEX image in Figure 3B. **(B)** Single objects  
641 detected in Figure 3B were spatially segmented into neighbourhoods using a raster scan with  
642 a radius of 50µm. Plot represents clustering of cellular neighbourhoods based on their local  
643 composition of macrophages from the four clusters. Each colour represents a neighbourhood  
644 with a similar composition. **(C)** Representative images of interactions between macrophage  
645 subpopulations and Ter119<sup>+</sup> erythroblasts. Filled arrowheads indicate macrophages from the  
646 corresponding cluster, whereas empty arrowheads indicate interacting erythrocytes. Scale  
647 bar represents 15 µm. **(D)** Interaction frequency between Ter119<sup>+</sup> cells and distinct  
648 macrophage clusters, as indicated in (C). **(E)** The distance from the four macrophage  
649 clusters to their nearest erythrocyte in the entire tissue section was measured. One-way  
650 ANOVA; \*\*\*  $p < 0.001$ , \*\*\*\*  $p = 0.0001$ .

651

652 **Supplementary figure 4. Bulk RNA-sequencing and analysis of LT-HSC. (A)** Gating  
653 strategy for sorting LT-HSC from *Tnfrsf11a*<sup>+/+</sup>; *Spi1*<sup>ff</sup> and *Tnfrsf11a*<sup>Cre</sup>; *Spi1*<sup>ff</sup> fetal livers at  
654 E14.5 for RNA-sequencing. **(B)** Heatmap of all differentially expressed genes between LT-  
655 HSCs from *Tnfrsf11a*<sup>+/+</sup>; *Spi1*<sup>ff</sup> and *Tnfrsf11a*<sup>Cre</sup>; *Spi1*<sup>ff</sup> at E14.5 with adjusted p-value <0.1.  
656 **(C)** Heatmap of genes belonging to the GO terms 'mononuclear cell proliferation' and  
657 'myeloid cell differentiation'.

658

659 **Supplementary figure 5. Gating strategies for flow-cytometry data. (A)** Gating strategy  
660 for quantification of stem and progenitor cells in fetal livers at E14.5. CLP: common lymphoid  
661 progenitor; CMP: common myeloid progenitor; GMP: granulocyte-macrophage progenitor;  
662 LT-HSC: long-term hematopoietic stem cells; MEP: megakaryocyte-erythrocyte progenitor;  
663 MPP: multipotent progenitors; ST-HSC: short-term hematopoietic stem cells. **(B)** Gating  
664 strategy for quantification of myeloid cells in fetal livers at E14.5.

665

## 666 **Acknowledgements**

667 We thank Cornelia Cygon for technical support and Florent Ginhoux for providing *Ms4a3*<sup>Cre</sup>  
668 mice. The work in the labs was supported by the following grants: a) Funded by the

669 Deutsche Forschungsgemeinschaft (DFG, German Research Foundation) under Germany's  
670 Excellence Strategy-EXC2151-390873048 (to EM, JLS, EK, and AS), GRK2168 (to EM),  
671 GRK1873/2 (to EM), SFB1454 (to EM, JLS, AS, and MB), b) Boehringer Ingelheim Fonds  
672 (doctoral fellowship to KM).

673

#### 674 **Author contributions**

675 EM and AHK conceived the project. AHK, IS, DAB, HH, KM, NM, DH, NRB, COS, performed  
676 experiments. AHK, IS, DAB, HH, DH analyzed data. EM, SU, MB, AS supervised  
677 experiments and data analysis. KB and JLS provided help with scRNA-seq experiments and  
678 analyses. EM, EK, SU, AS gave technical support and conceptual advice. EM and AHK  
679 wrote the manuscript. All authors discussed the results and commented on the manuscript.

680

#### 681 **Competing interests**

682 The authors declare that they have no conflict of interests.

683

#### 684 **References**

- 685 Aegerter H, Lambrecht BN, Jakubzick C v. 2022. Biology of lung macrophages in health and  
686 disease. *Immunity* **55**:1564–1580. doi:10.1016/J.IMMUNI.2022.08.010
- 687 Alsayegh K, Cortés-Medina L v., Ramos-Mandujano G, Badraiq H, Li M. 2019.  
688 Hematopoietic Differentiation of Human Pluripotent Stem Cells: HOX and GATA  
689 Transcription Factors as Master Regulators. *Curr Genomics* **20**:438–452.  
690 doi:10.2174/1389202920666191017163837
- 691 Arora N, Wenzel PL, McKinney-Freeman SL, Ross SJ, Kim PG, Chou SS, Yoshimoto M,  
692 Yoder MC, Daley GQ. 2014. Effect of developmental stage of HSC and recipient on  
693 transplant outcomes. *Dev Cell* **29**:621. doi:10.1016/J.DEVCEL.2014.04.013
- 694 Azzoni E, Frontera V, McGrath KE, Harman J, Carrelha J, Nerlov C, Palis J, Jacobsen SEW,  
695 Bruijn MF de. 2018. Kit ligand has a critical role in mouse yolk sac and aorta–gonad–  
696 mesonephros hematopoiesis. *EMBO Rep* **19**. doi:10.15252/EMBR.201745477
- 697 Bankhead P, Loughrey MB, Fernández JA, Dombrowski Y, McArt DG, Dunne PD, McQuaid  
698 S, Gray RT, Murray LJ, Coleman HG, James JA, Salto-Tellez M, Hamilton PW. 2017.  
699 QuPath: Open source software for digital pathology image analysis. *Scientific Reports*  
700 **2017 7:1 7**:1–7. doi:10.1038/s41598-017-17204-5
- 701 Black S, Phillips D, Hickey JW, Kennedy-Darling J, Venkataraman VG, Samusik N, Goltsev  
702 Y, Schürch CM, Nolan GP. 2021. CODEX multiplexed tissue imaging with DNA-  
703 conjugated antibodies. *Nature Protocols* **2021 16:8 16**:3802–3835. doi:10.1038/s41596-  
704 021-00556-8
- 705 Chow A, Huggins M, Ahmed J, Hashimoto D, Lucas D, Kunisaki Y, Pinho S, Leboeuf M,  
706 Noizat C, van Rooijen N, Tanaka M, Zhao ZJ, Bergman A, Merad M, Frenette PS. 2013.  
707 CD169+ macrophages provide a niche promoting erythropoiesis under homeostasis and  
708 stress. *Nature Medicine* **2013 19:4 19**:429–436. doi:10.1038/nm.3057
- 709 Chow A, Lucas D, Hidalgo A, Méndez-Ferrer S, Hashimoto D, Scheiermann C, Battista M,  
710 Leboeuf M, Prophete C, van Rooijen N, Tanaka M, Merad M, Frenette PS. 2011. Bone  
711 marrow CD169+ macrophages promote the retention of hematopoietic stem and  
712 progenitor cells in the mesenchymal stem cell niche. *Journal of Experimental Medicine*  
713 **208**:261–271. doi:10.1084/JEM.20101688
- 714 Crocker PR, Werb Z, Gordon S, Bainton DF. 1990. Ultrastructural Localization of a  
715 Macrophage-Restricted Sialic Acid Binding Hemagglutinin, SER, in Macrophage-

- 716 Hematopoietic Cell Clusters. *Blood* **76**:1131–1138.  
717 doi:10.1182/BLOOD.V76.6.1131.1131
- 718 Delfini M, Stakenborg N, Viola MF, Boeckxstaens G. 2022. Macrophages in the gut: Masters  
719 in multitasking. *Immunity* **55**:1530–1548. doi:10.1016/J.IMMUNI.2022.08.005
- 720 Demirci S, Leonard A, Tisdale JF. 2020. Hematopoietic stem cells from pluripotent stem  
721 cells: Clinical potential, challenges, and future perspectives. *Stem Cells Transl Med*  
722 **9**:1549. doi:10.1002/SCTM.20-0247
- 723 Fitch SR, Kimber GM, Wilson NK, Parker A, Mirshekar-Syahkal B, Göttgens B, Medvinsky A,  
724 Dzierzak E, Ottersbach K. 2012. Signaling from the sympathetic nervous system  
725 regulates hematopoietic stem cell emergence during embryogenesis. *Cell Stem Cell*  
726 **11**:554–566. doi:10.1016/j.stem.2012.07.002
- 727 Fraser ST, Isern J, Baron MH. 2007. Maturation and enucleation of primitive erythroblasts  
728 during mouse embryogenesis is accompanied by changes in cell-surface antigen  
729 expression. *Blood* **109**:343–352. doi:10.1182/BLOOD-2006-03-006569
- 730 Frede A, Czarnewski P, Monasterio G, Tripathi KP, Bejarano DA, Ramirez Flores RO, Sorini  
731 C, Larsson L, Luo X, Geerlings L, Novella-Rausell C, Zagami C, Kuiper R, Morales RA,  
732 Castillo F, Hunt M, Mariano LL, Hu YOO, Engblom C, Lennon-Duménil A-M, Mittenzwei  
733 R, Westendorf AM, Hövelmeyer N, Lundeberg J, Saez-Rodriguez J, Schlitzer A, Das S,  
734 Villablanca EJ. 2022. B cell expansion hinders the stroma-epithelium regenerative cross  
735 talk during mucosal healing. *Immunity* **55**. doi:10.1016/J.IMMUNI.2022.11.002
- 736 Frelin C, Herrington R, Janmohamed S, Barbara M, Tran G, Paige CJ, Benveniste P, Zuñiga-  
737 Pflücker JC, Souabni A, Busslinger M, Iscove NN. 2013. GATA-3 regulates the self-  
738 renewal of long-term hematopoietic stem cells. *Nature Immunology* **2013** *14*:10  
739 **14**:1037–1044. doi:10.1038/ni.2692
- 740 Freyer L, Sommer A, Cumano A, Gomez Perdiguero E. 2021. Fetal Hematopoiesis is Driven  
741 by Privileged Expansion and Differentiation of HSC-Independent Erythro-Myeloid  
742 Progenitors. doi:10.21203/rs.3.rs-1002760/v1
- 743 Gao S, Shi Q, Zhang Y, Liang G, Kang Z, Huang B, Ma D, Wang L, Jiao J, Fang X, Xu CR,  
744 Liu L, Xu X, Göttgens B, Li C, Liu F. 2021. Identification of HSC/MPP expansion units in  
745 fetal liver by single-cell spatiotemporal transcriptomics. *Cell Res*. doi:10.1038/S41422-  
746 021-00540-7
- 747 Goltsev Y, Samusik N, Kennedy-Darling J, Bhate S, Hale M, Vazquez G, Black S, Nolan GP.  
748 2018. Deep Profiling of Mouse Splenic Architecture with CODEX Multiplexed Imaging.  
749 *Cell* **174**:968-981.e15. doi:10.1016/J.CELL.2018.07.010
- 750 Gomez Perdiguero E, Klapproth K, Schulz C, Busch K, Azzoni E, Crozet L, Garner H,  
751 Trouillet C, de Bruijn MF, Geissmann F, Rodewald HR. 2015. Tissue-resident  
752 macrophages originate from yolk-sac-derived erythro-myeloid progenitors. *Nature*  
753 **518**:547–551. doi:10.1038/nature13989
- 754 Gordy C, Pua H, Sempowski GD, He YW. 2011. Regulation of steady-state neutrophil  
755 homeostasis by macrophages. *Blood* **117**:618. doi:10.1182/BLOOD-2010-01-265959
- 756 Guilliams M, Scott CL. 2022. Liver macrophages in health and disease. *Immunity* **55**:1515–  
757 1529. doi:10.1016/J.IMMUNI.2022.08.002
- 758 Hadland B, Varnum-Finney B, Dozono S, Dignum T, Nourigat-McKay C, Heck AM, Ishida T,  
759 Jackson DL, Itkin T, Butler JM, Rafii S, Trapnell C, Bernstein ID. 2022. Engineering a  
760 niche supporting hematopoietic stem cell development using integrated single-cell  
761 transcriptomics. *Nature Communications* **2022** *13*:1 **13**:1–17. doi:10.1038/s41467-022-  
762 28781-z
- 763 Hoeffel G, Chen J, Lavin Y, Low D, Almeida FF, See P, Beaudin AE, Lum J, Low I, Forsberg  
764 EC, Poidinger M, Zolezzi F, Larbi A, Ng LG, Chan JK, Greter M, Becher B,  
765 Samokhvalov IM, Merad M, Ginhoux F. 2015. C-Myb(+) erythro-myeloid progenitor-  
766 derived fetal monocytes give rise to adult tissue-resident macrophages. *Immunity*  
767 **42**:665–678. doi:10.1016/j.immuni.2015.03.011
- 768 Hong C, Kidani Y, A-Gonzalez N, Phung T, Ito A, Rong X, Ericson K, Mikkola H, Beaven SW,  
769 Miller LS, Shao WH, Cohen PL, Castrillo A, Tontonoz P, Bensinger SJ. 2012.  
770 Coordinate regulation of neutrophil homeostasis by liver X receptors in mice. *J Clin*  
771 *Invest* **122**:337–347. doi:10.1172/JCI58393

- 772 Huang K, Du J, Ma N, Liu J, Wu P, Dong X, Meng M, Wang W, Chen X, Shi X, Chen Q,  
773 Yang Z, Chen S, Zhang J, Li Y, Li W, Zheng Y, Cai J, Li P, Sun X, Wang J, Pei D, Pan  
774 G. 2015. GATA2(-/-) human ESCs undergo attenuated endothelial to hematopoietic  
775 transition and thereafter granulocyte commitment. *Cell Regen* **4**:4:4.  
776 doi:10.1186/S13619-015-0018-7
- 777 Hur J, Choi J il, Lee Hwan, Nham P, Kim TW, Chae CW, Yun JY, Kang JA, Kang J, Lee SE,  
778 Yoon CH, Boo K, Ham S, Roh TY, Jun JK, Lee Ho, Baek SH, Kim HS. 2016.  
779 CD82/KAI1 Maintains the Dormancy of Long-Term Hematopoietic Stem Cells through  
780 Interaction with DARC-Expressing Macrophages. *Cell Stem Cell* **18**:508–521.  
781 doi:10.1016/j.stem.2016.01.013
- 782 Jacome-Galarza CE, Percin GI, Muller JT, Mass E, Lazarov T, Eitler J, Rauner M, Yadav VK,  
783 Crozet L, Bohm M, Loyher PL, Karsenty G, Waskow C, Geissmann F. 2019.  
784 Developmental origin, functional maintenance and genetic rescue of osteoclasts. *Nature*  
785 **568**:541–545. doi:10.1038/s41586-019-1105-7
- 786 Ku CJ, Hosoya T, Maillard I, Engel JD. 2012. GATA-3 regulates hematopoietic stem cell  
787 maintenance and cell-cycle entry. *Blood* **119**:2242. doi:10.1182/BLOOD-2011-07-  
788 366070
- 789 Kumar S, Geiger H. 2017. HSC Niche Biology and HSC Expansion Ex Vivo. *Trends Mol Med*  
790 **23**:799. doi:10.1016/J.MOLMED.2017.07.003
- 791 Lewis K, Yoshimoto M, Takebe T. 2021. Fetal liver hematopoiesis: from development to  
792 delivery. *Stem Cell Res Ther* **12**:1–8. doi:10.1186/S13287-021-02189-W/FIGURES/2
- 793 Li D, Xue W, Li M, Dong M, Wang J, Wang X, Li X, Chen K, Zhang W, Wu S, Zhang Y, Gao  
794 L, Chen Y, Chen J, Zhou BO, Zhou Y, Yao X, Li L, Wu D, Pan W. 2018. VCAM-1+  
795 macrophages guide the homing of HSPCs to a vascular niche. *Nature* **564**:119–124.  
796 doi:10.1038/s41586-018-0709-7
- 797 Li W, Wang Y, Zhao H, Zhang H, Xu Y, Wang S, Guo X, Huang Y, Zhang S, Han Y, Wu X,  
798 Rice CM, Huang G, Gallagher PG, Mendelson A, Yazdanbakhsh K, Liu J, Chen L, An X.  
799 2019. Identification and transcriptome analysis of erythroblastic island macrophages.  
800 *Blood* **134**:480–491. doi:10.1182/BLOOD.2019000430
- 801 Liu F, Lee JY, Wei H, Tanabe O, Engel JD, Morrison SJ, Guan JL. 2010. FIP200 is required  
802 for the cell-autonomous maintenance of fetal hematopoietic stem cells. *Blood* **116**:4806.  
803 doi:10.1182/BLOOD-2010-06-288589
- 804 Liu Zhaoyuan, Gu Y, Chakarov S, Bleriot C, Kwok I, Chen X, Shin A, Huang W, Dress RJ,  
805 Dutertre C-A, Schlitzer A, Chen J, Ng LG, Wang H, Liu Zhiduo, Su B, Ginhoux F. 2019.  
806 Fate Mapping via Ms4a3-Expression History Traces Monocyte-Derived Cells. *Cell*  
807 **178**:1509-1525.e19. doi:10.1016/j.cell.2019.08.009
- 808 Mariani SA, Li Z, Rice S, Krieg C, Frangkogianni S, Robinson M, Vink CS, Pollard JW,  
809 Dzierzak E. 2019. Pro-inflammatory Aorta-Associated Macrophages Are Involved in  
810 Embryonic Development of Hematopoietic Stem Cells. *Immunity* **50**:1439.  
811 doi:10.1016/J.IMMUNI.2019.05.003
- 812 Mass E. 2018. Delineating the origins, developmental programs and homeostatic functions of  
813 tissue-resident macrophages. *Int Immunol* **30**:493–501. doi:10.1093/intimm/dxy044
- 814 Mass E, Ballesteros I, Farlik M, Halbritter F, Gunther P, Crozet L, Jacome-Galarza CE,  
815 Handler K, Klughammer J, Kobayashi Y, Gomez-Perdiguero E, Schultze JL, Beyer M,  
816 Bock C, Geissmann F. 2016. Specification of tissue-resident macrophages during  
817 organogenesis. *Science (1979)* **353**:aaf4238–aaf4238. doi:10.1126/science.aaf4238
- 818 May A, Forrester LM. 2020. The erythroblastic island niche: modeling in health, stress, and  
819 disease. *Exp Hematol* **91**:10–21. doi:10.1016/J.EXPHEM.2020.09.185
- 820 McKercher SR, Torbett BE, Anderson KL, Henkel GW, Vestal DJ, Baribault H, Klemsz M,  
821 Feeney AJ, Wu GE, Paige CJ, Maki RA. 1996. Targeted disruption of the PU.1 gene  
822 results in multiple hematopoietic abnormalities. *EMBO J* **15**:5647–5658.
- 823 Millard SM, Heng O, Opperman KS, Sehgal A, Irvine KM, Kaur S, Sandrock CJ, Wu AC,  
824 Magor GW, Batoon L, Perkins AC, Noll JE, Zannettino ACW, Sester DP, Levesque JP,  
825 Hume DA, Raggatt LJ, Summers KM, Pettit AR. 2021. Fragmentation of tissue-resident  
826 macrophages during isolation confounds analysis of single-cell preparations from  
827 mouse hematopoietic tissues. *Cell Rep* **37**.

- 828 doi:10.1016/J.CELREP.2021.110058/ATTACHMENT/827DD845-2D0A-4082-8E66-  
829 5311E67AA111/MMC1.PDF
- 830 Mohamad SF, Xu L, Ghosh J, Childress PJ, Abeysekera I, Himes ER, Wu H, Alvarez MB,  
831 Davis KM, Aguilar-Perez A, Hong JM, Bruzzaniti A, Kacena MA, Srour EF. 2017.  
832 Osteomacs interact with megakaryocytes and osteoblasts to regulate murine  
833 hematopoietic stem cell function. *Blood Adv* **1**:2520–2528.  
834 doi:10.1182/BLOODADVANCES.2017011304
- 835 Morris L, Crocker PR, Fraser I, Hill M, Gordon S. 1991. Expression of a divalent cation-  
836 dependent erythroblast adhesion receptor by stromal macrophages from murine bone  
837 marrow. *J Cell Sci* **99 ( Pt 1)**:141–147. doi:10.1242/JCS.99.1.141
- 838 Morris L, Crocker PR, Gordon S. 1988. Murine fetal liver macrophages bind developing  
839 erythroblasts by a divalent cation-dependent hemagglutinin. *J Cell Biol* **106**:649–656.  
840 doi:10.1083/JCB.106.3.649
- 841 Mukherjee K, Xue L, Planutis A, Gnanapragasam MN, Chess A, Bieker JJ. 2021. Eklf/klf1  
842 expression defines a unique macrophage subset during mouse erythropoiesis:  
843 EKLf/Klf1 role in fetal liver island macrophages. *Elife* **10**:1–42.  
844 doi:10.7554/ELIFE.61070
- 845 Palis J. 2017. Interaction of the Macrophage and Primitive Erythroid Lineages in the  
846 Mammalian Embryo. *Front Immunol* **7**:669. doi:10.3389/fimmu.2016.00669
- 847 Palis J. 2014. Primitive and definitive erythropoiesis in mammals. *Front Physiol* **5 JAN**:3.  
848 doi:10.3389/FPHYS.2014.00003/BIBTEX
- 849 Picelli S, Faridani OR, Björklund ÅK, Winberg G, Sagasser S, Sandberg R. 2014. Full-length  
850 RNA-seq from single cells using Smart-seq2. *Nat Protoc* **9**:171–181.  
851 doi:10.1038/nprot.2014.006
- 852 Pop R, Shearstone JR, Shen Q, Liu Y, Hallstrom K, Koultnis M, Gribnau J, Socolovsky M.  
853 2010. A Key Commitment Step in Erythropoiesis Is Synchronized with the Cell Cycle  
854 Clock through Mutual Inhibition between PU.1 and S-Phase Progression. *PLoS Biol* **8**.  
855 doi:10.1371/JOURNAL.PBIO.1000484
- 856 Popescu DM, Botting RA, Stephenson E, Green K, Webb S, Jardine L, Calderbank EF,  
857 Polanski K, Goh I, Efremova M, Acres M, Maunder D, Vegh P, Gitton Y, Park JE, Vento-  
858 Tormo R, Miao Z, Dixon D, Rowell R, McDonald D, Fletcher J, Poyner E, Reynolds G,  
859 Mather M, Moldovan C, Mamanova L, Greig F, Young MD, Meyer KB, Lisgo S, Bacardit  
860 J, Fuller A, Millar B, Innes B, Lindsay S, Stubbington MJT, Kowalczyk MS, Li B,  
861 Ashenberg O, Tabaka M, Dionne D, Tickle TL, Slyper M, Rozenblatt-Rosen O, Filby A,  
862 Carey P, Villani AC, Roy A, Regev A, Chédotal A, Roberts I, Göttgens B, Behjati S,  
863 Laurenti E, Teichmann SA, Haniffa M. 2019. Decoding human fetal liver  
864 haematopoiesis. *Nature* **574**:365–371. doi:10.1038/s41586-019-1652-y
- 865 Rodrigues NP, Boyd AS, Fugazza C, May GE, Guo YP, Tipping AJ, Scadden DT, Vyas P,  
866 Enver T. 2008. GATA-2 regulates granulocyte-macrophage progenitor cell function.  
867 *Blood* **112**:4862–4873. doi:10.1182/BLOOD-2008-01-136564
- 868 Sakaki-Yumoto M, Katsuno Y, Derynck R. 2013. TGF- $\beta$  family signaling in stem cells.  
869 *Biochim Biophys Acta* **1830**:2280. doi:10.1016/J.BBAGEN.2012.08.008
- 870 Schindelin J, Arganda-Carreras I, Frise E, Kaynig V, Longair M, Pietzsch T, Preibisch S,  
871 Rueden C, Saalfeld S, Schmid B, Tinevez JY, White DJ, Hartenstein V, Eliceiri K,  
872 Tomancak P, Cardona A. 2012. Fiji: an open-source platform for biological-image  
873 analysis. *Nature Methods* **2012 9:7** **9**:676–682. doi:10.1038/nmeth.2019
- 874 Scott EW, Simon MC, Anastasi J, Singh H. 1994. Requirement of transcription factor PU.1 in  
875 the development of multiple hematopoietic lineages. *Science (1979)* **265**:1573–1577.
- 876 Seu KG, Papoin J, Fessler R, Hom J, Huang G, Mohandas N, Blanc L, Kalfa TA. 2017.  
877 Unraveling macrophage heterogeneity in erythroblastic islands. *Front Immunol* **8**:1140.  
878 doi:10.3389/FIMMU.2017.01140/BIBTEX
- 879 Seyfried AN, Maloney JM, MacNamara KC. 2020. Macrophages Orchestrate Hematopoietic  
880 Programs and Regulate HSC Function During Inflammatory Stress. *Front Immunol* **11**.  
881 doi:10.3389/FIMMU.2020.01499

- 882 Shao X, Liao J, Li C, Lu X, Cheng J, Fan X. 2021. CellTalkDB: a manually curated database  
883 of ligand-receptor interactions in humans and mice. *Brief Bioinform* **22**.  
884 doi:10.1093/BIB/BBAA269
- 885 Stark MA, Huo Y, Burcin TL, Morris MA, Olson TS, Ley K. 2005. Phagocytosis of apoptotic  
886 neutrophils regulates granulopoiesis via IL-23 and IL-17. *Immunity* **22**:285–294.  
887 doi:10.1016/J.IMMUNI.2005.01.011
- 888 Stremmel C, Schuchert R, Wagner F, Thaler R, Weinberger T, Pick R, Mass E, Ishikawa-  
889 Ankerhold HC, Margraf A, Hutter S, Vagnozzi R, Klapproth S, Frampton J, Yona S,  
890 Scheiermann C, Molkentin JD, Jeschke U, Moser M, Sperandio M, Massberg S,  
891 Geissmann F, Schulz C. 2018. Yolk sac macrophage progenitors traffic to the embryo  
892 during defined stages of development. *Nat Commun* **9**:75. doi:10.1038/s41467-017-  
893 02492-2
- 894 Theodore LN, Hagedorn EJ, Cortes M, Natsuhara K, Liu SY, Perlin JR, Yang S, Daily ML,  
895 Zon LI, North TE. 2017. Distinct Roles for Matrix Metalloproteinases 2 and 9 in  
896 Embryonic Hematopoietic Stem Cell Emergence, Migration, and Niche Colonization.  
897 *Stem Cell Reports* **8**:1226–1241.  
898 doi:10.1016/J.STEMCR.2017.03.016/ATTACHMENT/31E8ECD2-8F30-4E88-8E63-  
899 95B3A114602B/MMC5.MP4
- 900 Tsai FY, Keller G, Kuo FC, Weiss M, Chen J, Rosenblatt M, Alt FW, Orkin SH. 1994. An  
901 early haematopoietic defect in mice lacking the transcription factor GATA-2. *Nature*  
902 **371**:221–226. doi:10.1038/371221A0
- 903 Tsai F-Y, Orkin SH. 1997. Transcription Factor GATA-2 Is Required for Proliferation/Survival  
904 of Early Hematopoietic Cells and Mast Cell Formation, But Not for Erythroid and Myeloid  
905 Terminal Differentiation. *Blood* **89**:3636–3643. doi:10.1182/BLOOD.V89.10.3636
- 906 Wattrus SJ, Smith ML, Rodrigues CP, Hagedorn EJ, Kim JW, Budnik B, Zon LI. 2022.  
907 Quality assurance of hematopoietic stem cells by macrophages determines stem cell  
908 clonality. *Science (1979)* **377**:1413–1419. doi:10.1126/SCIENCE.ABO4837
- 909 Werner Y, Mass E, Ashok Kumar P, Ulas T, Händler K, Horne A, Klee K, Lupp A, Schütz D,  
910 Saaber F, Redecker C, Schultze JL, Geissmann F, Stumm R. 2020. Cxcr4 distinguishes  
911 HSC-derived monocytes from microglia and reveals monocyte immune responses to  
912 experimental stroke. *Nat Neurosci* **23**:351–362. doi:10.1038/s41593-020-0585-y
- 913 Wilkinson AC, Ishida R, Nakauchi H, Yamazaki S. 2020. Long-term ex vivo expansion of  
914 mouse hematopoietic stem cells. *Nat Protoc* **15**:628. doi:10.1038/S41596-019-0263-2
- 915 Wolf FA, Hamey FK, Plass M, Solana J, Dahlin JS, Göttgens B, Rajewsky N, Simon L, Theis  
916 FJ. 2019. PAGA: graph abstraction reconciles clustering with trajectory inference  
917 through a topology preserving map of single cells. *Genome Biol* **20**:1–9.  
918 doi:10.1186/S13059-019-1663-X/FIGURES/4
- 919 Yamanaka S. 2020. Pluripotent Stem Cell-Based Cell Therapy-Promise and Challenges. *Cell*  
920 *Stem Cell* **27**:523–531. doi:10.1016/J.STEM.2020.09.014

922

## 923 **Material and Methods**

924

### 925 **Chemicals and solutions**

926

| Item            | Company                 | Cat. #       |
|-----------------|-------------------------|--------------|
| Acetone         | Sigma Aldrich           | 650501-1L    |
| Benzyl-alcohol  | Millipore Sigma         | Sigma 108014 |
| Benzyl-benzoate | Merck                   | 68183        |
| BS3 fixative    | ThermoFisher Scientific | 21580        |
| CODEX Buffer    | Akoya Biosciences       | 7000001      |

|                                                                  |                          |               |
|------------------------------------------------------------------|--------------------------|---------------|
| CODEX conjugation kit                                            | Akoya Biosciences        | 7000009       |
| CODEX staining kit                                               | Akoya Biosciences        | 7000008       |
| CollagenaseD                                                     | Sigma-Aldrich            | 11088882001   |
| DAPI (4',6-Diamidino-2-Phenylindole, Dilactate)                  | BioLegend                | 422801        |
| DNase                                                            | Sigma-Aldrich            | DN25-1G       |
| DRAQ7                                                            | BioLegend                | 424001        |
| Dulbecco's Phosphate-Buffered Saline (DPBS)                      | PAN-Biotech              | P04-53500     |
| EDTA (Ethylenediaminetetraacetic acid)                           | Sigma-Aldrich            | E9884-500G    |
| Fetal calf serum                                                 | Bio&Sell                 | FBS. S 0615HI |
| Giemsa solution                                                  | Merck                    | 109204        |
| May-Grünwald solution                                            | Merck                    | 101424        |
| Methanol                                                         | Fisher Scientific        | 10164663      |
| Methanol for HPLC >99.9%                                         | Sigma Aldrich            | 34860-1L-R    |
| MethoCult                                                        | StemCell Technologies    | 3434          |
| Normal Goat Serum                                                | VWR                      | ICNA 08642921 |
| Paraformaldehyde (PFA)                                           | Thermo Fisher Scientific | 11586711      |
| PBS (10x) without Ca <sup>++</sup> , Mg <sup>++</sup>            | Biozym                   | 882131        |
| Progesterone                                                     | Sigma-Aldrich            | P3972-5G      |
| QIAzol Lysis Reagent                                             | Qiagen                   | 79306         |
| Rat serum                                                        | Bio-Rad                  | C13SD         |
| Roswell Park Memorial Institute medium (Seahorse XF RPMI medium) | Agilent Technologies     | 103576-100    |
| Sucrose                                                          | Fisher Scientific        | 10638403      |
| Tamoxifen                                                        | Sigma-Aldrich            | T5648         |
| Triton X100                                                      | Fisher Scientific        | BP151-100     |
| Weise buffer tablet                                              | Merck                    | 109468        |

927

## 928 **Experimental mice**

929 All mice were maintained on a C57BL/6 background and housed in SPF conditions. Animal  
930 procedures were performed in adherence to our project license 2018.A056 issued by the  
931 "Landesamt für Natur, Umwelt und Verbraucherschutz" (LANUV). Whenever possible, The  
932 ARRIVE guidelines 2.0 were followed (The ARRIVE Essential 10,  
933 <https://arriveguidelines.org/arrive-guidelines>). *Tnfrsf11a*<sup>Cre/+</sup>; *Spi1*<sup>f/+</sup> males were crossed to  
934 *Spi1*<sup>ff</sup> females to generate embryos lacking macrophages. *Tnfrsf11a*<sup>Cre/+</sup>, *Ms4a3*<sup>Cre/+</sup>, and  
935 *Cxcr4*<sup>CreERT/+</sup> mice were crossed to the *Rosa26*<sup>YFP</sup> strain to generate embryos suitable for the  
936 fate-mapping. Adult mice were mated overnight to obtain embryos. To fate-map HSCs,  
937 *Cxcr4*<sup>CreERT</sup>; *Rosa26*<sup>YFP</sup> embryos were pulsed using 4-hydroxytamoxifen injection (75mg/kg)  
938 at embryonic day (E)10.5. To prevent tamoxifen-related abortions, progesterone (37.5mg/kg)  
939 was injected simultaneously with tamoxifen into the mice. The female was examined for  
940 vaginal plug formation the next day and the embryos were considered to be E0.5.



941

## 942 **Cryosection and whole-mount immunostaining**

943 Pregnant mice were sacrificed through cervical dislocation. Embryos at E14.5 were  
944 harvested and stored in cold 1x Dulbecco's Phosphate-Buffered Saline (DPBS w/o Ca and  
945 Mg, PAN-Biotech) and dissected under a Leica M80 microscope. Fetal livers (FL) were  
946 harvested and fixed in 1 % paraformaldehyde (PFA) overnight at 4 °C for  
947 immunofluorescence staining. Fixed lobes were washed three times for 10 min with DPBS,  
948 incubated in 30 % sucrose. The fixed lobes were dehydrated using increasing methanol  
949 (Fisher Scientific) gradient diluted in DPBS. Samples were incubated with primary antibodies  
950 (AB) (Table S5) overnight at 4 °C in 0.4 % PBT (DPBS with 0.4 % TritonX x100). Afterward,  
951 the samples were washed three times for 10 min in washing buffer (DPBS with 0.2 % Triton  
952 x100, 3 % NaCl (Grüssing) at room temperature (RT). The same procedure was repeated  
953 using the secondary antibodies (Table S5) and, if needed, using the directly conjugated  
954 antibodies a third time. samples were cleared in benzyl-alcohol benzyl-benzoate (BABB 1:2  
955 proportion). Fetal liver lobes were placed for 30 min in 50 % BABB, followed by incubation in  
956 100 % BABB for 30 min to obtain transparent tissues. The samples were placed in a cavity  
957 slide (Brand) filled with BABB. A round cover glass was carefully placed on the tissue and  
958 sealed using nail polish. The samples were 3D visualized using LSM 880 Zeiss confocal  
959 microscope with a 63x (oil) objective.

## 960 **Co-detection by indexing (CODEX)**

961 5µm slices of fetal liver from E14.5 wildtype embryos were prepared and used for CODEX  
962 staining following the manufacturer's instructions. Briefly, sections were retrieved from the  
963 freezer, let dry on drierite beads, and fixed for 10 min in ice-cold acetone (Sigma Aldrich, St.  
964 Louis, MO, USA). After fixation, samples were rehydrated and photobleached twice as  
965 described in (Du, Lin et al. 2019). Following photobleaching, sections were blocked and  
966 stained with a 20-plex CODEX antibody panel (Table S5 and S6) overnight at 4 °C. After  
967 staining, samples were washed, fixed with ice-cold methanol, washed with 1x PBS, and fixed  
968 for 20 min with BS3 fixative (Sigma Aldrich, St. Louis, MO, USA). A final washing step with  
969 1x PBS was performed.

970 A multicycle CODEX experiment was performed following the manufacturer's instructions.  
971 Images were acquired with a Zeiss Axio Observer widefield fluorescence microscope using a  
972 20x objective (NA 0.85) and z-spacing of 1.5µm. The 405, 488, 568, and 647 nm channels  
973 were used. After imaging, raw files were exported using the CODEX Instrument Manager  
974 (Akoya Biosciences, Marlborough, MA, USA) and processed with CODEX Processor v1.7  
975 (Akoya Biosciences). Image processing included background subtraction using the DAPI  
976 signals of the first and last empty cycles of the acquisition, deconvolution, shading correction,  
977 and stitching. For cell segmentation, DAPI counterstain was used for object detection,

978 whereas sodium-potassium ATPase antibody staining was used as a membrane marker for  
979 delineating the cell shape.

980 A manual cell classification was performed in CODEX MAV 1.5 (Akoya Biosciences).  
981 Annotation of the macrophage clusters was done using the same gating strategy as in flow  
982 cytometry, with the difference that F4/80<sup>+</sup>CD11b<sup>+</sup> cells were not gated but F4/80<sup>+</sup> Iba1<sup>+</sup> cells.  
983 HSCs were gated as CD150<sup>+</sup> c-Kit<sup>+</sup> cells, erythrocytes as CD45<sup>-</sup>Ter119<sup>+</sup> cells, and blood  
984 vessels as CD45<sup>-</sup>CD31<sup>+</sup>SMA<sup>+</sup> cells. After cell classification, Voronoi diagrams were  
985 generated in CODEX MAV using the four macrophage clusters, blood vessels, and HSCs as  
986 seeds.

987

### 988 **Spatial analyses and determination of cellular neighborhoods with CODEX images**

989 LogOddRatio analysis for spatial interactions was performed in CODEX MAV. For this, after  
990 cell classification, the four macrophage populations, HSCs, and blood vessels were selected.  
991 The selected minimum and maximum distances of interaction were 5 and 50  $\mu\text{m}$ ,  
992 respectively.

993 For cellular neighborhood analyses, the .csv files generated with CODEX MAV were  
994 exported to CytoMAP (Stoltzfus, Filipek et al. 2020) and the same cell classification was  
995 used to annotate the cells. A raster scan with a radius of 50 $\mu\text{m}$  was performed to spatially  
996 segment the image. To define the cellular neighborhoods based on local composition, a self-  
997 organizing map (SOM) clustering algorithm was used, considering only the macrophage  
998 populations. Heatmaps were generated to determine the cell composition of each  
999 neighborhood. To measure the distances between macrophage clusters and erythrocytes,  
1000 images were exported to QuPath v0.3. and cells were detected using DAPI signals. Single  
1001 object classifiers for each marker were trained, and these were used to generate composite  
1002 classifiers to identify macrophage populations, erythrocytes, and HSCs as before. The  
1003 distance between the cells of each macrophage cluster and their closest erythrocyte was  
1004 measured and plotted.

1005 To validate the proximity of macrophage clusters to HSCs, images were exported to QuPath  
1006 v0.3, cells were segmented, and HSCs were identified, as described above. A circle with a  
1007 fixed radius of 50 $\mu\text{m}$  was drawn and centered on 20 randomly selected HSCs. Next, the  
1008 same composite classifiers to identify macrophage clusters were applied to the annotated  
1009 circles, and the number of cells of each macrophage cluster within the defined radius was  
1010 counted.

### 1011 **Software**

| Software                 | Producer          | Identifier |
|--------------------------|-------------------|------------|
| CODEX instrument manager | Akoya Biosciences |            |

|                 |                   |                           |
|-----------------|-------------------|---------------------------|
| CODEX Processor | Akoya Biosciences |                           |
| CODEX MAV       | Akoya Biosciences |                           |
| QuPath          |                   | (Bankhead et al., 2017)   |
| Image J         |                   | (Schindelin et al., 2012) |
| FlowJo          | BD                |                           |

1012

### 1013 **Colony-forming unit assay**

1014 CFU assays were performed according to the Mouse “Colony-Forming Unit” (CFU) Assays  
1015 Using MethoCult™ GF M3434 protocol (StemCell Technologies) (STEMCELL). Briefly, a  
1016 fetal liver lobe was collected in fluorescence cell sorting (FACS) buffer (1x DPBS with 2 %  
1017 100 mM Ethylenediaminetetraacetic acid (EDTA, Sigma-Aldrich), 0.5 % BSA) and digested  
1018 using digestion solution (1 % DNase (Sigma-Aldrich), 1 % collagenase D (Sigma-Aldrich),  
1019 3 % fetal calf serum (FCS, Bio&Sell), 1x DPBS). The samples were mechanically disrupted  
1020 and incubated for 30 min at 37 °C. Following the digestion, the whole volume was transferred  
1021 in a FACS tube and centrifuged for 5 min at 400 g, 4 °C. The supernatant was discarded,  
1022 and the pellet was resuspended in 1 ml sterile Roswell Park Memorial Institute medium  
1023 (RPMI, supplemented with 10 % FCS, 1 % Penicillin-Streptomycin, 1 % D-Glutamate, 1 %  
1024 Pyruvate).  $3 \times 10^5$  live cells were taken from the suspension and filled up to 1 ml with RPMI to  
1025 achieve a  $3 \times 10^5$  cells/ml concentration. 1.5 ml MethoCult aliquots (StemCell Technologies)  
1026 were thawed at room temperature and vortexed vigorously. The cell suspension was added  
1027 to the MethoCult in a way to achieve  $3 \times 10^4$  cells/ml concentration. 1 ml MethoCult mixed with  
1028 the cell suspension was slowly taken up using a pipette and then transferred to a 35 mm cell  
1029 culture dish (VWR). The cell culture dish was cautiously tilted until it was covered with  
1030 medium and was put inside the incubator. After 12 days of cell culture, colonies were first  
1031 identified by their phenotype, i.e. their size, shape, and density were analyzed based on  
1032 representative pictures shown in the CFU assay protocol by STEMCELL Technologies.  
1033 Subsequently, colonies were picked and identification was validated by the May-Grünwald-  
1034 Giemsa staining (Merck) of the colonies. Prior to the staining, the colonies were picked up  
1035 using a 10  $\mu$ L pipet under Leica M80 microscope and collected into microtubes containing  
1036 10  $\mu$ L FACS buffer. The collected colonies were transferred on slides using cytopsin funnels  
1037 (Hettich), centrifuged at 800RPM by a cytopsin centrifuge (Hettich) for 10 min. After the  
1038 centrifuge the slides were air-dried and fixed using cold methanol.

### 1039 **Flow-cytometry sample preparation and data acquisition**

1040 Pregnant mice were sacrificed through cervical dislocation at E14.5. The fetal liver, brain, and  
1041 lung were harvested from the embryos of the *Tnfrsf11a*<sup>Cre</sup>; *Spi1*<sup>flox/+</sup>. The collected tissues  
1042 were digested for 20 min at 37 °C in a digestion solution. The cell suspensions were

1043 centrifuged and the supernatants were removed. The pellets were resuspended in 50µL  
1044 blocking solution (2 % rat serum) for 10 min incubation on ice. The volume of each sample of  
1045 the *Tnfrsf11a<sup>Cre</sup>; Spi1<sup>flox/+</sup>* model was measured to obtain the total cell number. The samples  
1046 were stained with primary antibodies for 25 min (Table S5). Afterward, the samples were  
1047 washed by adding 100 µL FACS to the suspension and centrifuge at 400 g for 5 min at 4 °C.  
1048 The same procedure was repeated for the secondary antibodies. Finally, the cells were  
1049 stained with Hoechst live/dead staining (1:10000) before flow-cytometry and recorded using  
1050 a FACSymphony™ (BD Biosciences) cytometer.

1051 The same procedure was also done with harvested fetal livers from wild-type embryos at  
1052 E14.5. These samples were stained with primary and secondary antibodies designated to  
1053 investigate the heterogeneity of macrophages (Table S5). The cells were stained with  
1054 DRAQ7 live/dead staining (1:1000) before flow-cytometry and recorded using a  
1055 FACSymphony™ cytometer.

1056

#### 1057 **Analysis of flow-cytometry data for quantification of cells**

1058 Flow-cytometry data analysis was performed using FlowJo™ Software v.10.8.1 Becton,  
1059 Dickinson, and Company. the quantification of myeloid cells in the fetal liver and the  
1060 erythrocytes differentiation was done using the supplementary Figure 3A gating strategy. The  
1061 quantification of HSCs and progenitors was done using supplementary Figure 3B gating  
1062 strategy and the quantification of macrophages in the control organ, the fetal brain, and the  
1063 fetal lung, was done using supplementary Figure 3C gating strategy. The count of each cell  
1064 type was recorded and plotted using R (v. 4.0.5) and the ggplot2 (v. 3.3.5) and ggpubr (v.  
1065 0.4.0) (Wickham, Chang et al. 2016, Kassambara and Kassambara 2020).

1066

#### 1067 **Analysis of flow-cytometry data for heterogeneity of macrophages**

1068 The CD11b<sup>+</sup> F4/80<sup>+</sup> cells were gated (Figure S1A) and downsampled using downsample  
1069 plug-in (v.3.3.1) in Flowjo. The downsampled population was imported and analyzed in R  
1070 (<https://www.r-project.org/> v. 4.0.5). The importing and processing of data was done using  
1071 the CATALYST package (v. 1.18.1) (Crowell H 2022), which was installed through the  
1072 Bioconductor package (v 3.14). The visualization of data was done using the UMAP  
1073 algorithm (McInnes, Healy et al. 2018), and the clustering of data was done using FlowSOM  
1074 (Van Gassen, Callebaut et al. 2015) clustering and ConsensusClusterPlus metaclustering  
1075 (Wilkerson and Hayes 2010). The resulting clusters were manually inspected for expression  
1076 of different markers and clusters of interests were subset and merged if necessary to form  
1077 final clusters that would represent the macrophages and their heterogeneity.

1078

#### 1079 **Cell-sorting of HSCs and macrophages for RNA-sequencing**

1080 Pregnant mice were sacrificed through cervical dislocation at embryonic day E14.5. The fetal  
1081 liver was collected from *Tnfrsf11a*<sup>Cre/+</sup>; *Spi1*<sup>ff</sup> and wild-type mouse models' embryos. The  
1082 collected tissues were digested for 20 min at 37 °C in a digestion solution. The cell  
1083 suspensions were centrifuged and the supernatants were removed. The pellets were  
1084 resuspended in 50 µL blocking solution (2 % rat serum) for 10 min incubation on ice. The  
1085 samples were washed and stained for 25 min. At the end of incubation, the samples were  
1086 washed and centrifuged at 400 g for 5 min at 4 °C. Finally, the pellet was resuspended in  
1087 FACS buffer. The cells were stained with DAPI live/dead staining in a final dilution 1:10000  
1088 before flow-cytometry analysis using BD FACS ARIA III<sup>TM</sup>. ~700-1200 LT-HSCs were sorted  
1089 according to the gating strategy (Supplementary Figure 4A) into microtubes containing  
1090 500 µL of Qiazol lysis buffer while the CD11b<sup>low/+</sup> F4/80<sup>+</sup> cells (Supplementary Figure 1A)  
1091 were sorted into microtubes containing 100 µL of FACS buffer. The cells were used for  
1092 loading the arrays in the next steps for single-cell RNA sequencing.

1093

#### 1094 **Bulk-RNA sequencing and analysis**

1095 10 samples in total (4 controls and 6 knockouts) were analysed for the bulk RNA-  
1096 sequencing. Total RNA was extracted using the miRNeasy micro kit (Qiagen) and quantified  
1097 via RNA assay on a tape station 4200 system (Agilent). 5ng total RNA was used as an input  
1098 for library generation via SmartSeq 2 (SS2) RNA library production protocol as previously  
1099 described (Picelli et al., 2014). Pre-amplification PCR was performed with 16 cycles for  
1100 samples. Libraries were quantified using the Qubit HS dsDNA assay (Invitrogen), and  
1101 fragment size distribution was analyzed via D1000 assay on a tape station 4200 system  
1102 (Agilent). SS2 libraries were sequenced single-end with 75 cycles on a NextSeq2000 system  
1103 using P3 chemistry (Illumina). Samples were demultiplexed and fastq files were generated  
1104 using bcl2fastq2 v2.20 before alignment and quantification using Kallisto v0.44.0 based on  
1105 the Gencode (mm10, GRCm38) vM16 (Ensembl 91) reference genomes. Sequencing results  
1106 from the experiments were pseudoaligned using the Kallisto tool set. The counts were  
1107 imported into R and analyzed using the DEseq2 package (Love, Huber et al. 2014). The  
1108 genes with less than 11 counts in all samples were removed. The counts were transformed  
1109 using the variance Stabilizing Transformation (VST) function of the DEseq2 pipeline. The  
1110 knockout samples were compared to the control samples during the analysis, and genes  
1111 were ranked on the differential expression (LFC threshold of 0.1, adjusted p-value (BH)  
1112 <0.1). The ranked gene list was divided into down and up-regulated genes (Logfold2change  
1113 >0.5 and <-0.5) and used for gene ontology analysis using the clusterProfiler package (Yu,

1114 Wang et al. 2012). The DEGs were visualized using volcano plot using Enhancedvolcano  
1115 package (Blighe 2018).

1116

### 1117 **Single-cell RNA sequencing**

1118 Seq-Well arrays were prepared as described by Gierahn et al. (Gierahn, Wadsworth et al.  
1119 2017). Seq-Well libraries were generated as described by Gierahn et al and Hughes et al.  
1120 (Gierahn, Wadsworth et al. 2017, Hughes, Wadsworth et al. 2020). The cDNA libraries (1 ng)  
1121 were tagged with home-made single-loaded Tn5 transposase in TAPS-DMF buffer  
1122 (50 mM TAPS-NaOH (pH 8.5), 25 mM MgCl<sub>2</sub>, 50 % DMF in H<sub>2</sub>O) for 10 min at 55 °C and the  
1123 tagged products were cleaned with the MinElute PCR kit following the manufacturer's  
1124 instructions. Finally, a master mix was prepared (2X NEBNext High Fidelity PCR Master Mix,  
1125 10 µM barcoded index primer, 10 µM P5-SMART-PCR primer) and added to the samples to  
1126 attach the Illumina indices to the tagged products in a PCR reaction (72 °C for 5 min,  
1127 98 °C for 30 s, 15 cycles of 98 °C for 10 s, 63 °C for 30 s, 72 °C for 1 min). The pools were  
1128 cleaned with 0.6 x volumetric ratio AMPure XP beads. The final library quality was assessed  
1129 using a High Sensitivity DNA5000 assay on a TapeStation 4200 (Agilent) and quantified  
1130 using the Qubit high-sensitivity dsDNA assay. Seq-Well libraries were equimolarly pooled  
1131 and clustered at 1.4pM concentration with 10% PhiX using High Output v2.5 chemistry on a  
1132 NextSeq500 system. Sequencing was performed paired-end using custom Drop-Seq Read 1  
1133 primer for 21 cycles, 8 cycles for the i7 index, and 61 cycles for Read 2. Single-cell data were  
1134 demultiplexed using bcl2fastq2 (v2.20). Fastq files from Seq-Well were loaded into a  
1135 snakemake-based data pre-processing pipeline (version 0.31, available at  
1136 <https://github.com/Hoohm/dropSeqPipe>) that relies on the Drop-seq tools provided by the  
1137 McCarroll lab (Macosko, Basu et al. 2015). STAR alignment within the pipeline was  
1138 performed using the murine GENCODE reference genome and transcriptome mm10 release  
1139 vM16 (Team 2014).

### 1140 **Analysis of single-cell RNA sequencing**

1141 The Single-cell RNA was analyzed using the scanpy package (v.1.8.1) (Wolf, Angerer et al.  
1142 2018) in python (v.3.4.1) (Van Rossum and Drake Jr 1995). The cells were pre-processed  
1143 and filtered by checking for cells expressing less than 200 genes in less than three cells.  
1144 After the filtration, cells were processed further and clustered using the Leiden algorithm  
1145 (Traag, Waltman et al. 2019). The clusters were investigated using their differentially  
1146 expressed genes (DEG). The DEG lists were identified using Wilcoxon-Signed-Rank Test  
1147 (Rey and Neuhäuser 2011) by comparing each cluster to the rest of the clusters. The  
1148 selection of the clusters of interest was done in an iterative way. Three clustering steps were  
1149 performed in total to subset the cells. Briefly, the first round of clustering was done in a none-

1150 stringent manner and the resulted groups were monitored for their DEGs and were assigned  
1151 to certain cell types that they resembled most. Based on the DEGs the clusters 1, 4, 5, and 9  
1152 were containing macrophages while the other groups were representing other cell types and  
1153 states. This selection was assured further by exploring the expression of a set of pre-  
1154 macrophages (pMac) markers among the selected clusters. Clusters that could contain  
1155 macrophages were subset for a second round of clustering. The subset cells were processed  
1156 and clustered for a second time to have more homogenous cells regarding cell types. Again,  
1157 the clusters were subjected to another round of selection using two different sets of signature  
1158 markers for genes that are expressed in macrophages. The selected clusters in the second  
1159 round were subset and the cells were processed for a final round of clustering resulting in  
1160 distinguishable clusters of macrophage cells and their precursors from the rest. The finals  
1161 clusters were analyzed and the DEGs for the were extracted A psuedotime analysis using  
1162 the Partition-based graph abstraction (PAGA) method (Wolf, Hamey et al. 2019) was later  
1163 performed to analyze the trajectory of these groups.

1164

#### 1165 **Correlation matrix**

1166 To make a correlation between the single-cell RNA-seq data and the flow-cytometry data, the  
1167 clusters of interest from both of the datasets were extracted. The expression values of  
1168 mutual markers between them were scaled and normalized for each of the two datasets. The  
1169 correlation between the two datasets was calculated using spearman's rank correlation  
1170 coefficient and results were visualized using the pretty heatmap package (Kolde and Kolde  
1171 2015) in R.

1172

#### 1173 **Ligand-Receptor analysis**

1174 CellTalk database information (Shao et al., 2021) was download and the ligands list were  
1175 explored among the expressed genes of the five final macrophage clusters and the ligands  
1176 that were expressed were selected (208 ligands). A GO analysis using ClusterProfiler  
1177 package was done on the selected ligand's genes. Terms that were associated with the  
1178 hematopoiesis were selected and the genes belonging to these terms were extracted. Genes  
1179 with a minimum of five counts (single-cell data) among the three final macrophage clusters  
1180 were chosen (100 ligands). Their corresponding receptors were taken from the CellTalk  
1181 database. The expression of those receptors was explored in the bulk RNA-seq data from  
1182 control LT-HSCs and the receptors that had more than average of 40 counts were selected.  
1183 The ligand and receptor interactions were visualized using a circular plot using circlize  
1184 package (Gu, Gu et al. 2014).

1185

#### 1186 **Data availability**

1187 RNA-seq data from bulk and single-cell experiments are available under GEO accession  
1188 number GSE225444. Source data for CODEX pictures and analyses are available as  
1189 pyramidal file at Drayd (Mass, Elvira (2023), Source Data Kayvanjoo et al., Dryad, Dataset,  
1190 <https://doi.org/10.5061/dryad.fn2z34v00>). All other data will be made available upon  
1191 reasonable request.



# Figure 1 Kayvanjoo et al.

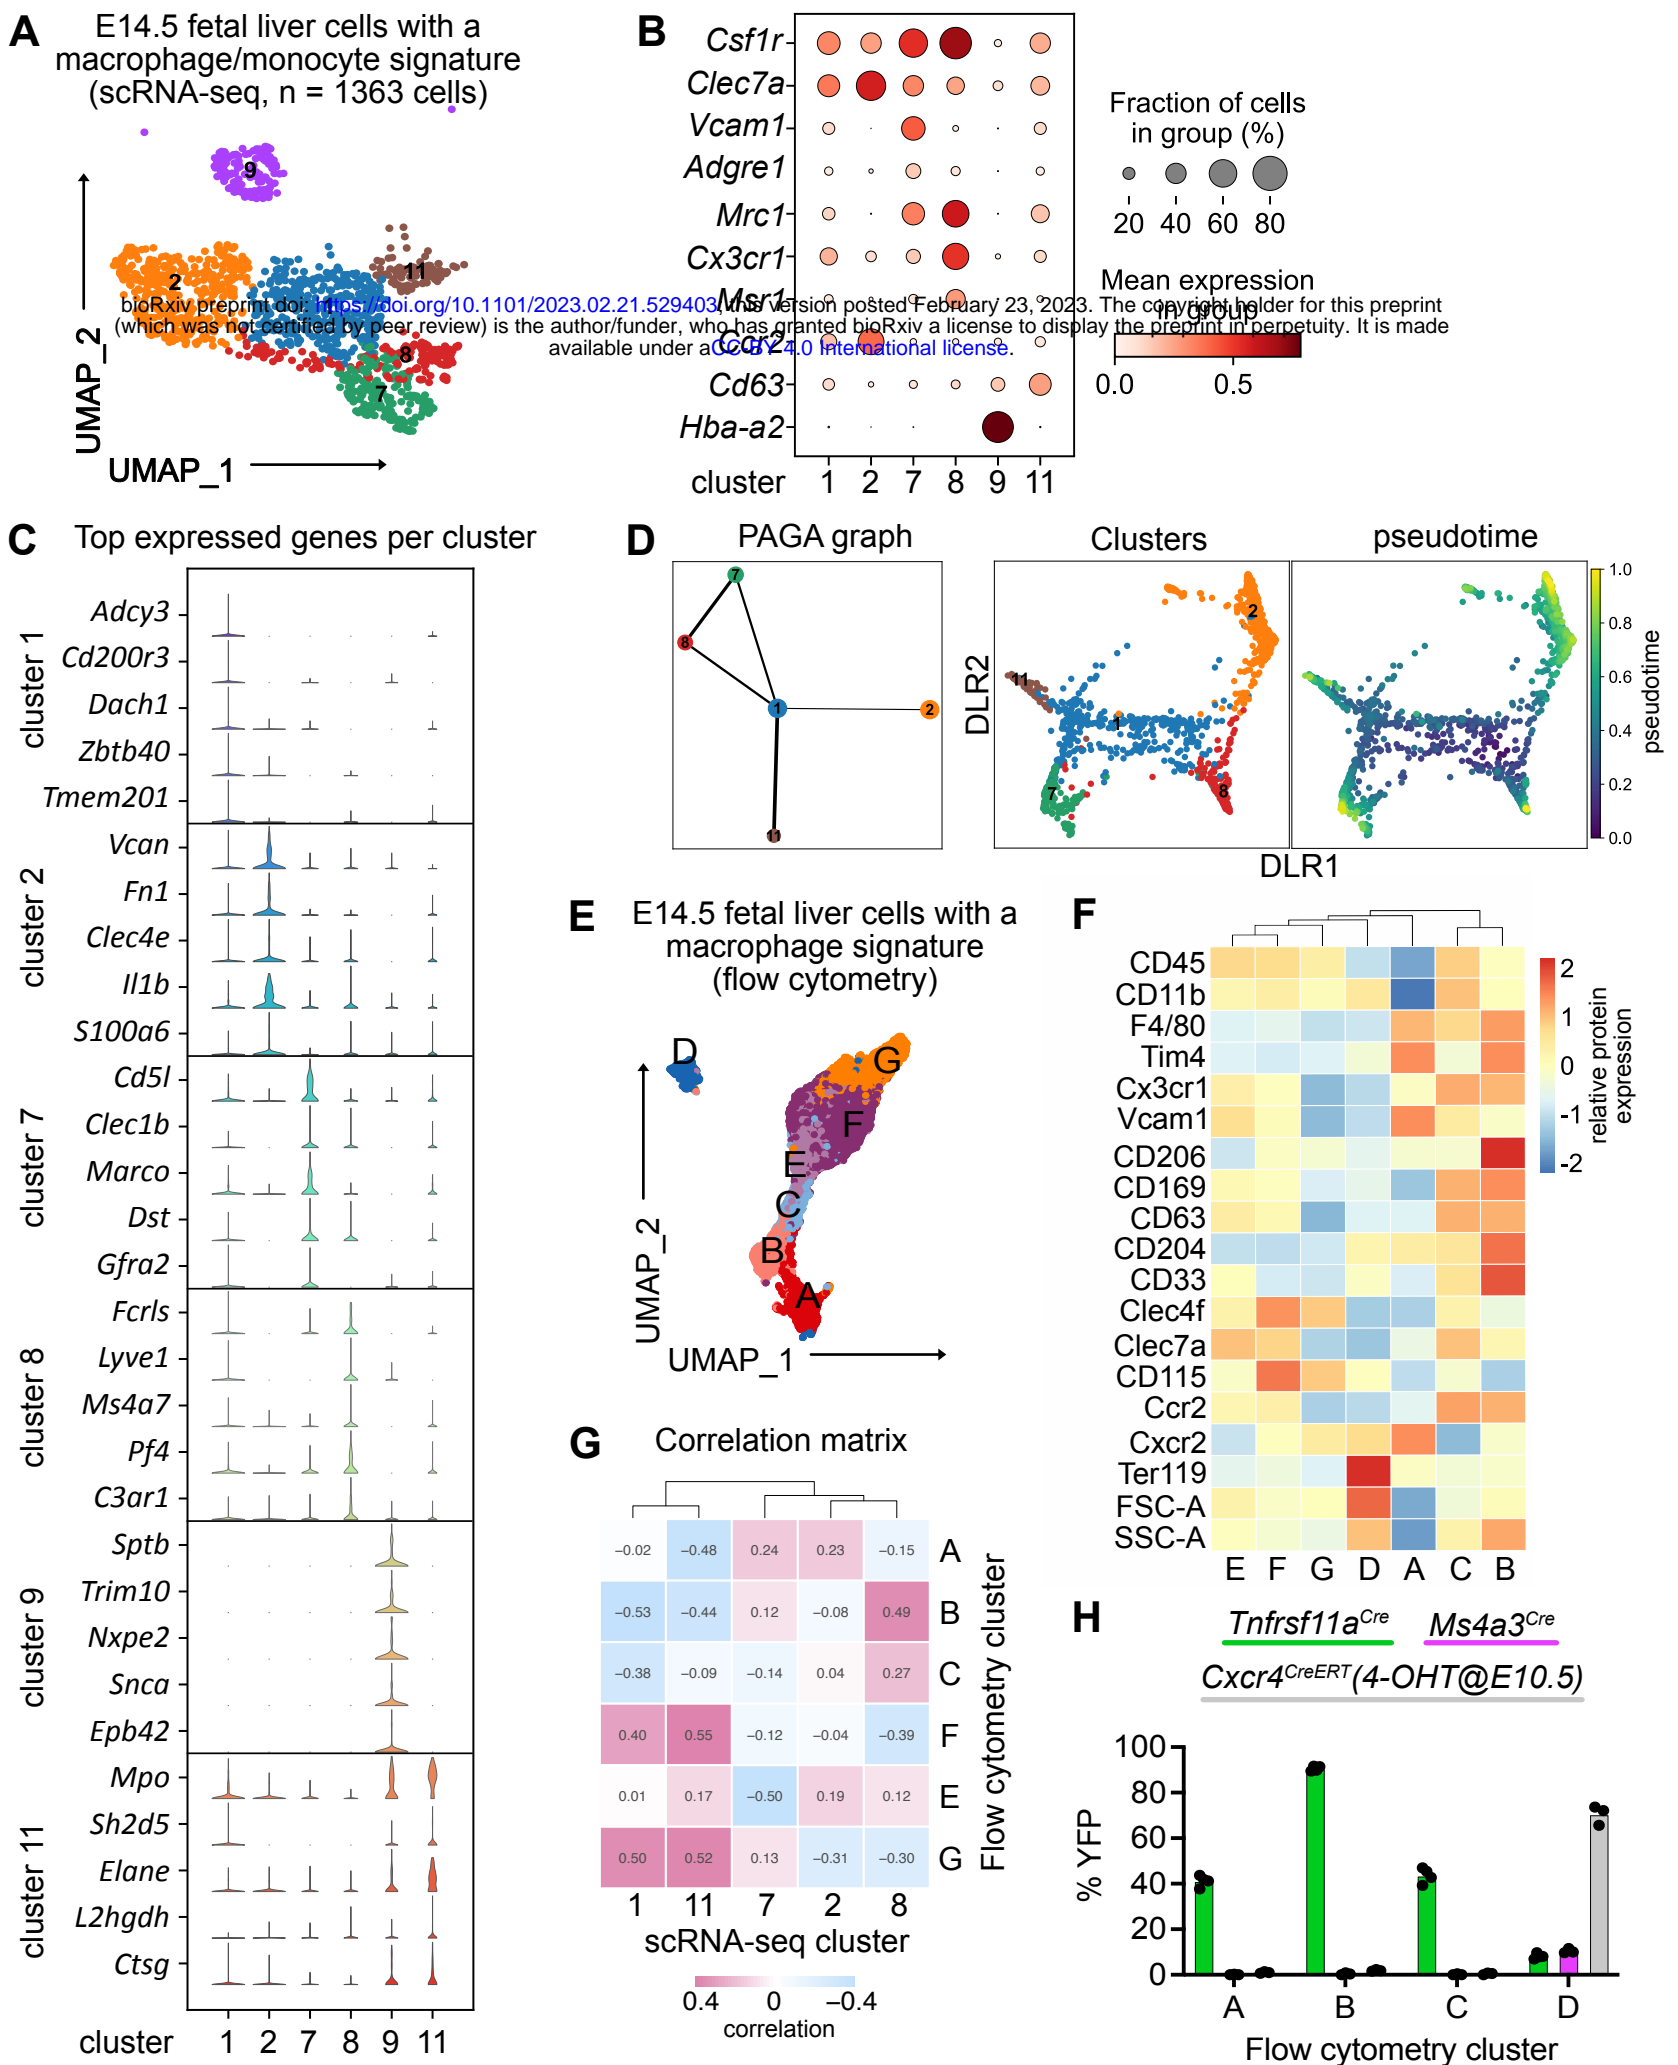

**I** Gated on single live CD45+ cells

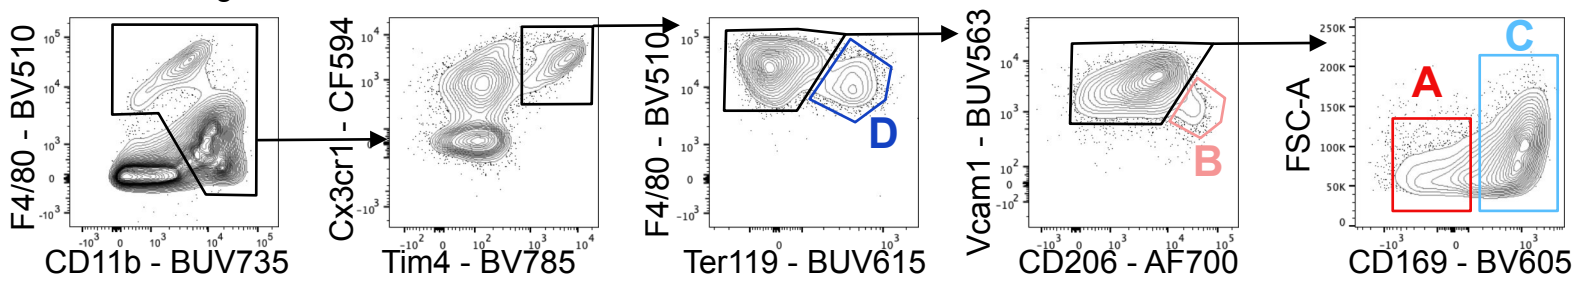

**Figure 2 Kayvanjoo et al.**

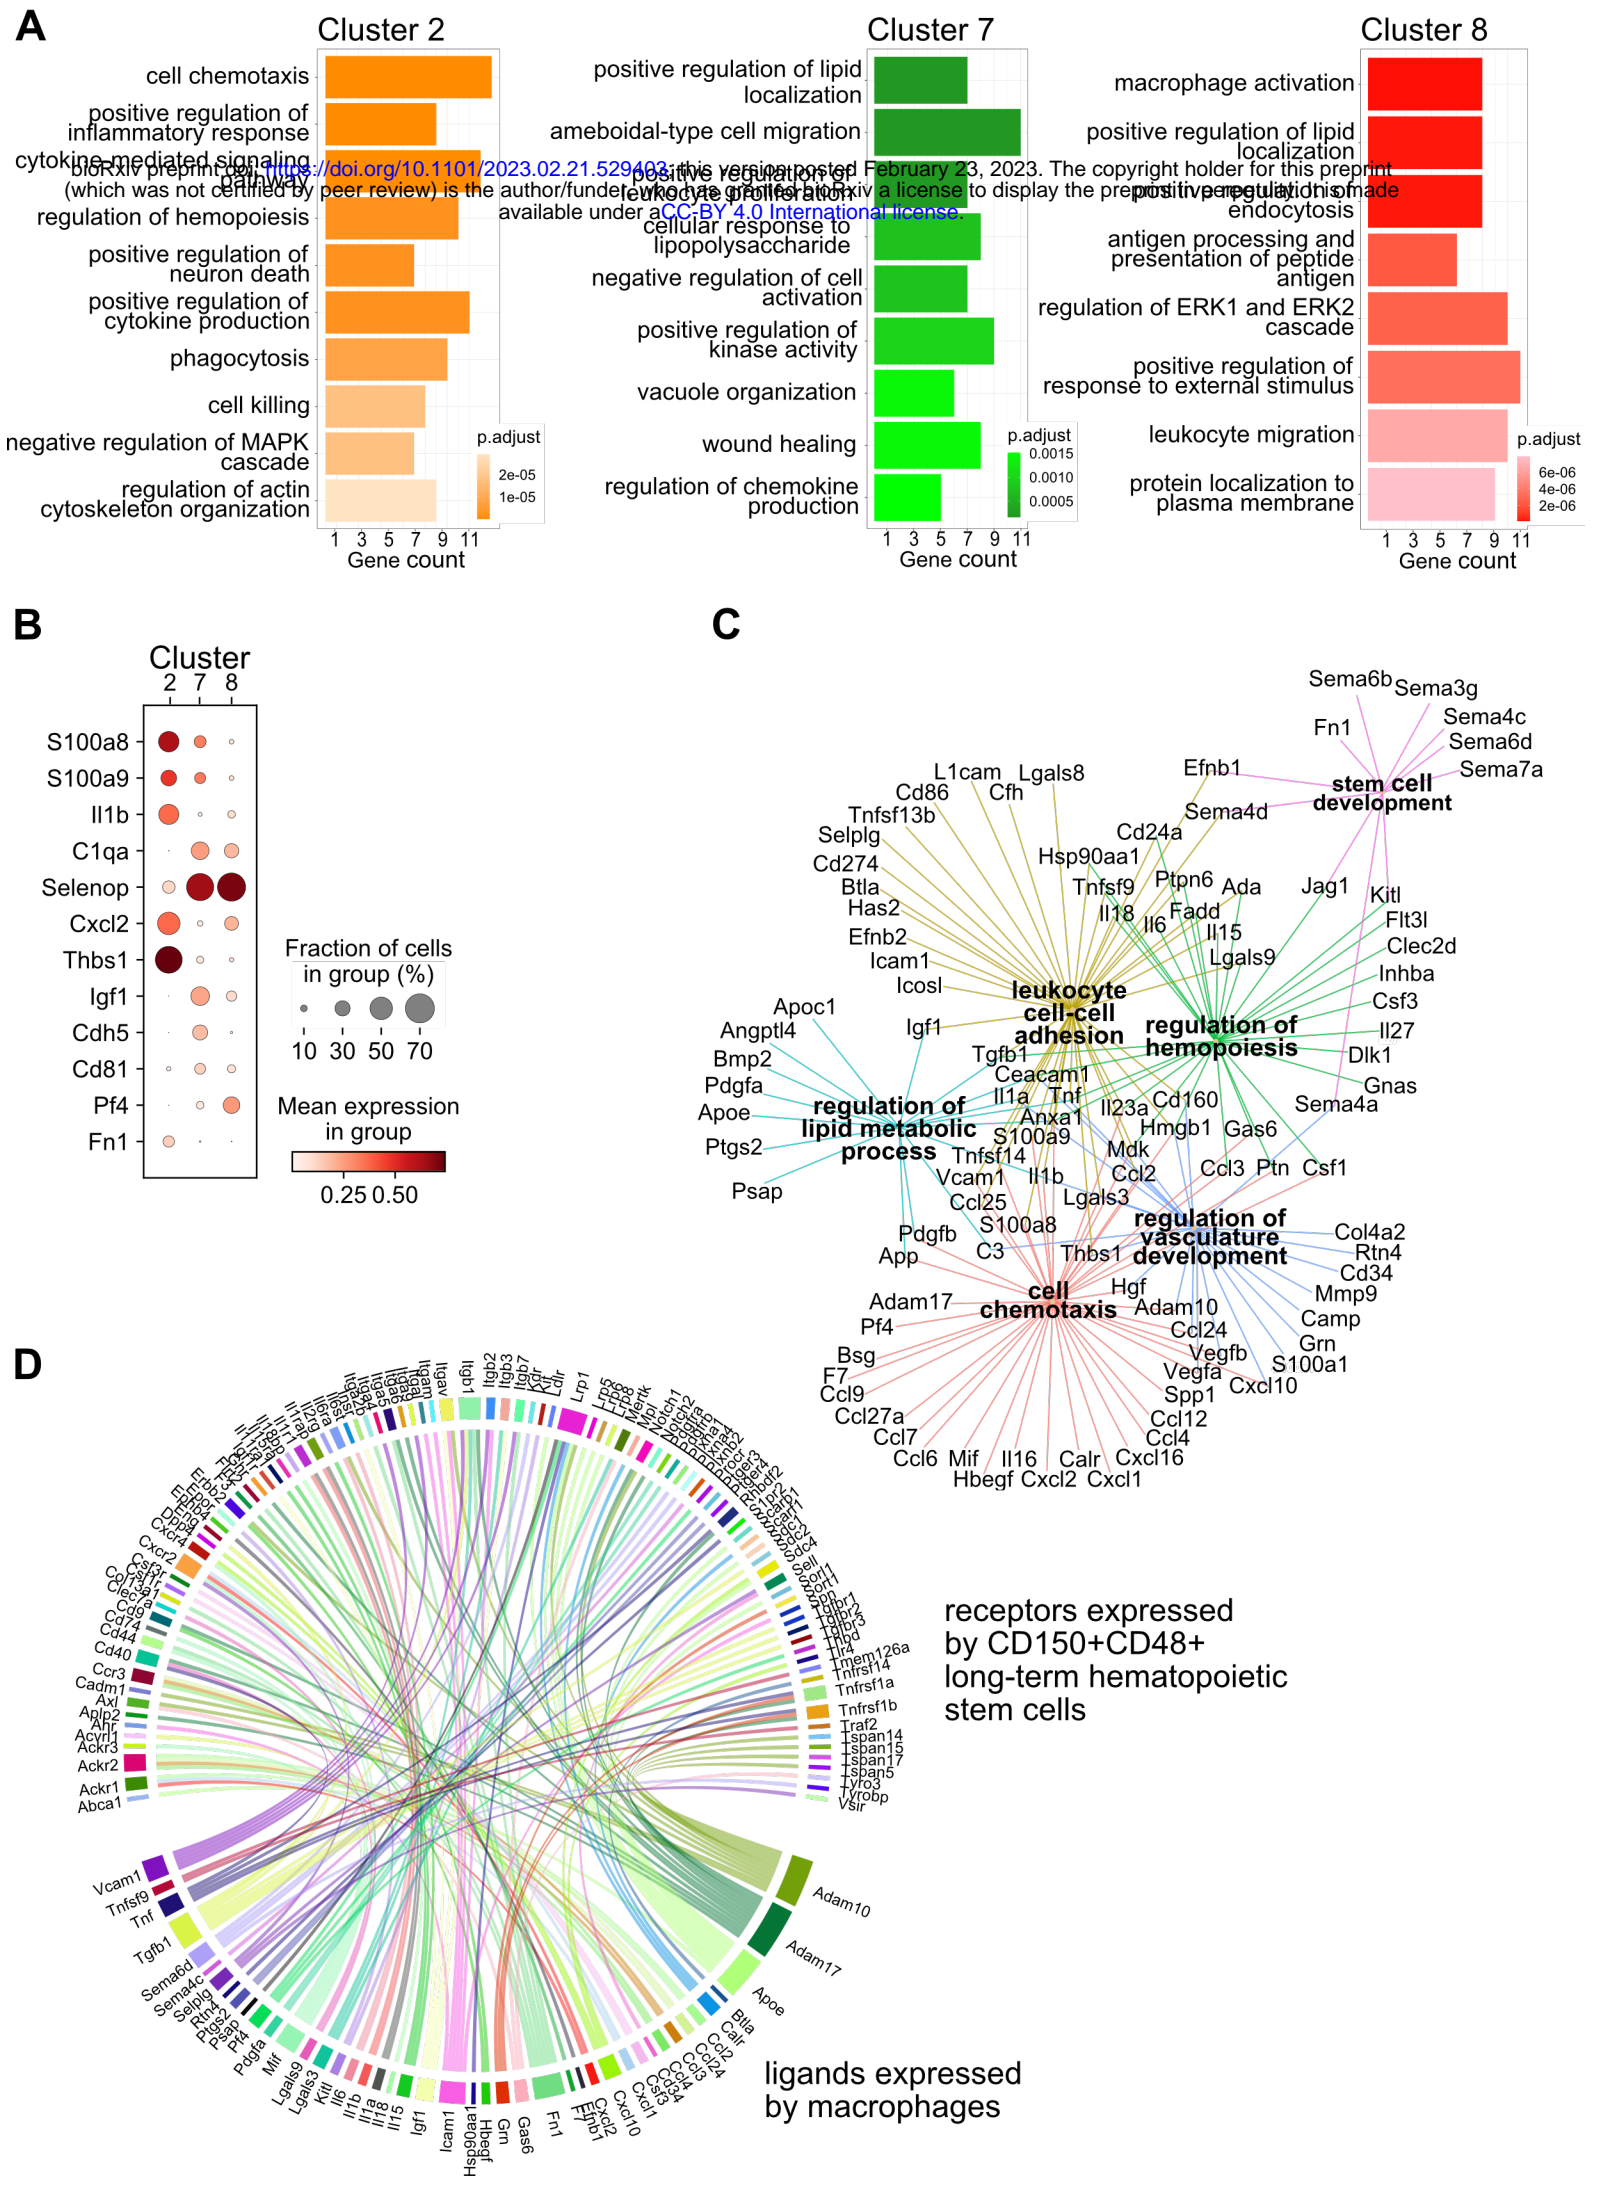



# Figure 4 Kayvanjoo et al.

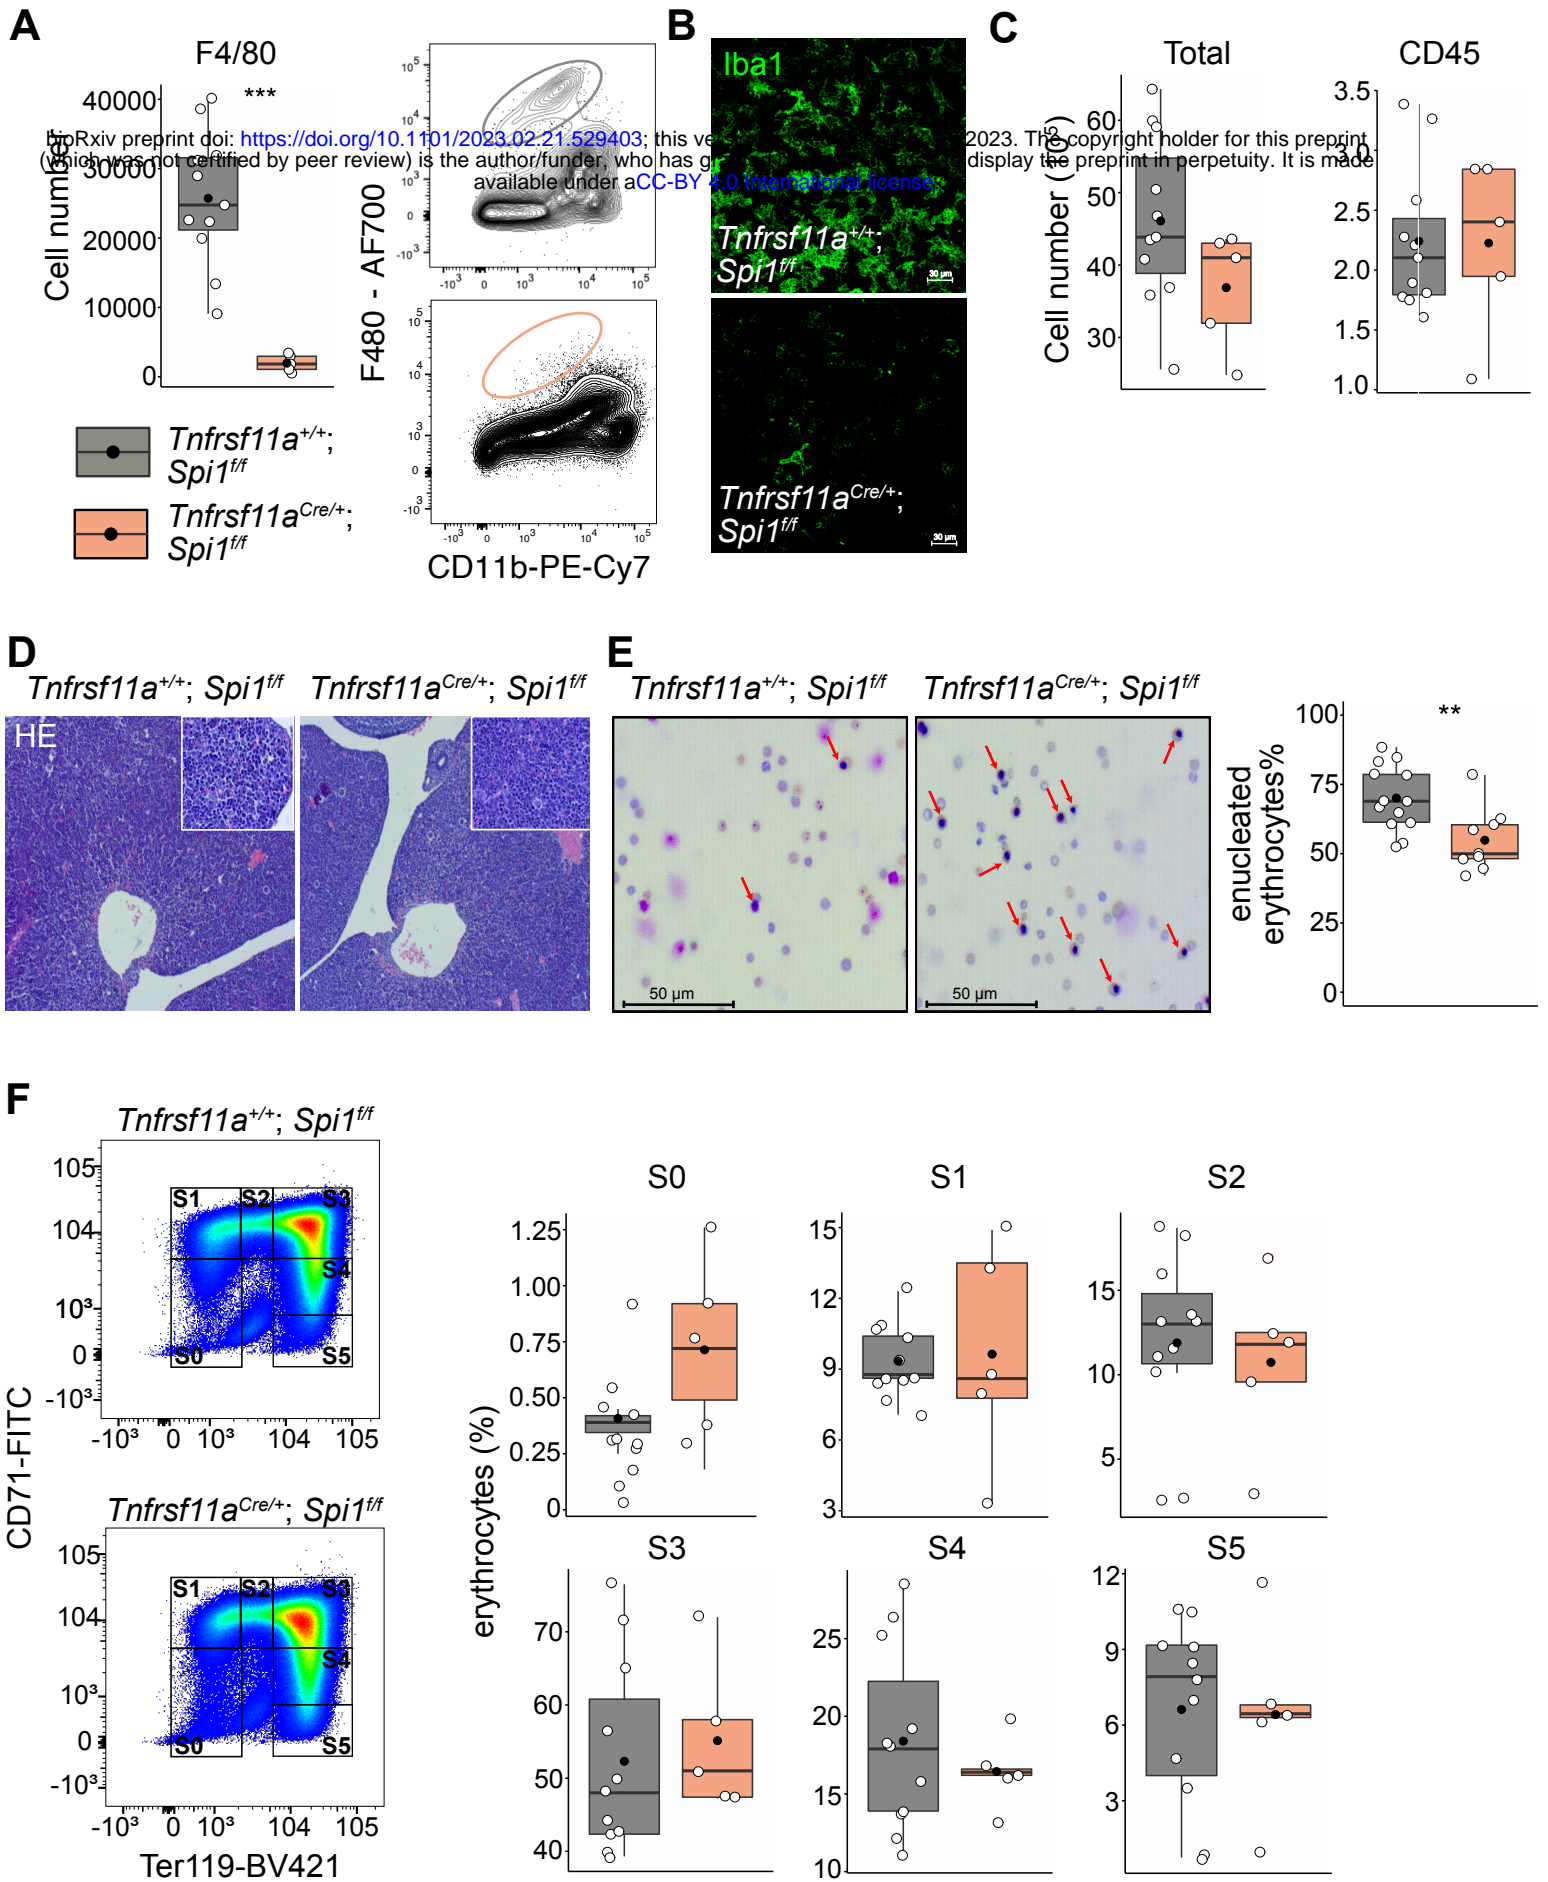

# Figure 5 Kayvanjoo et al.

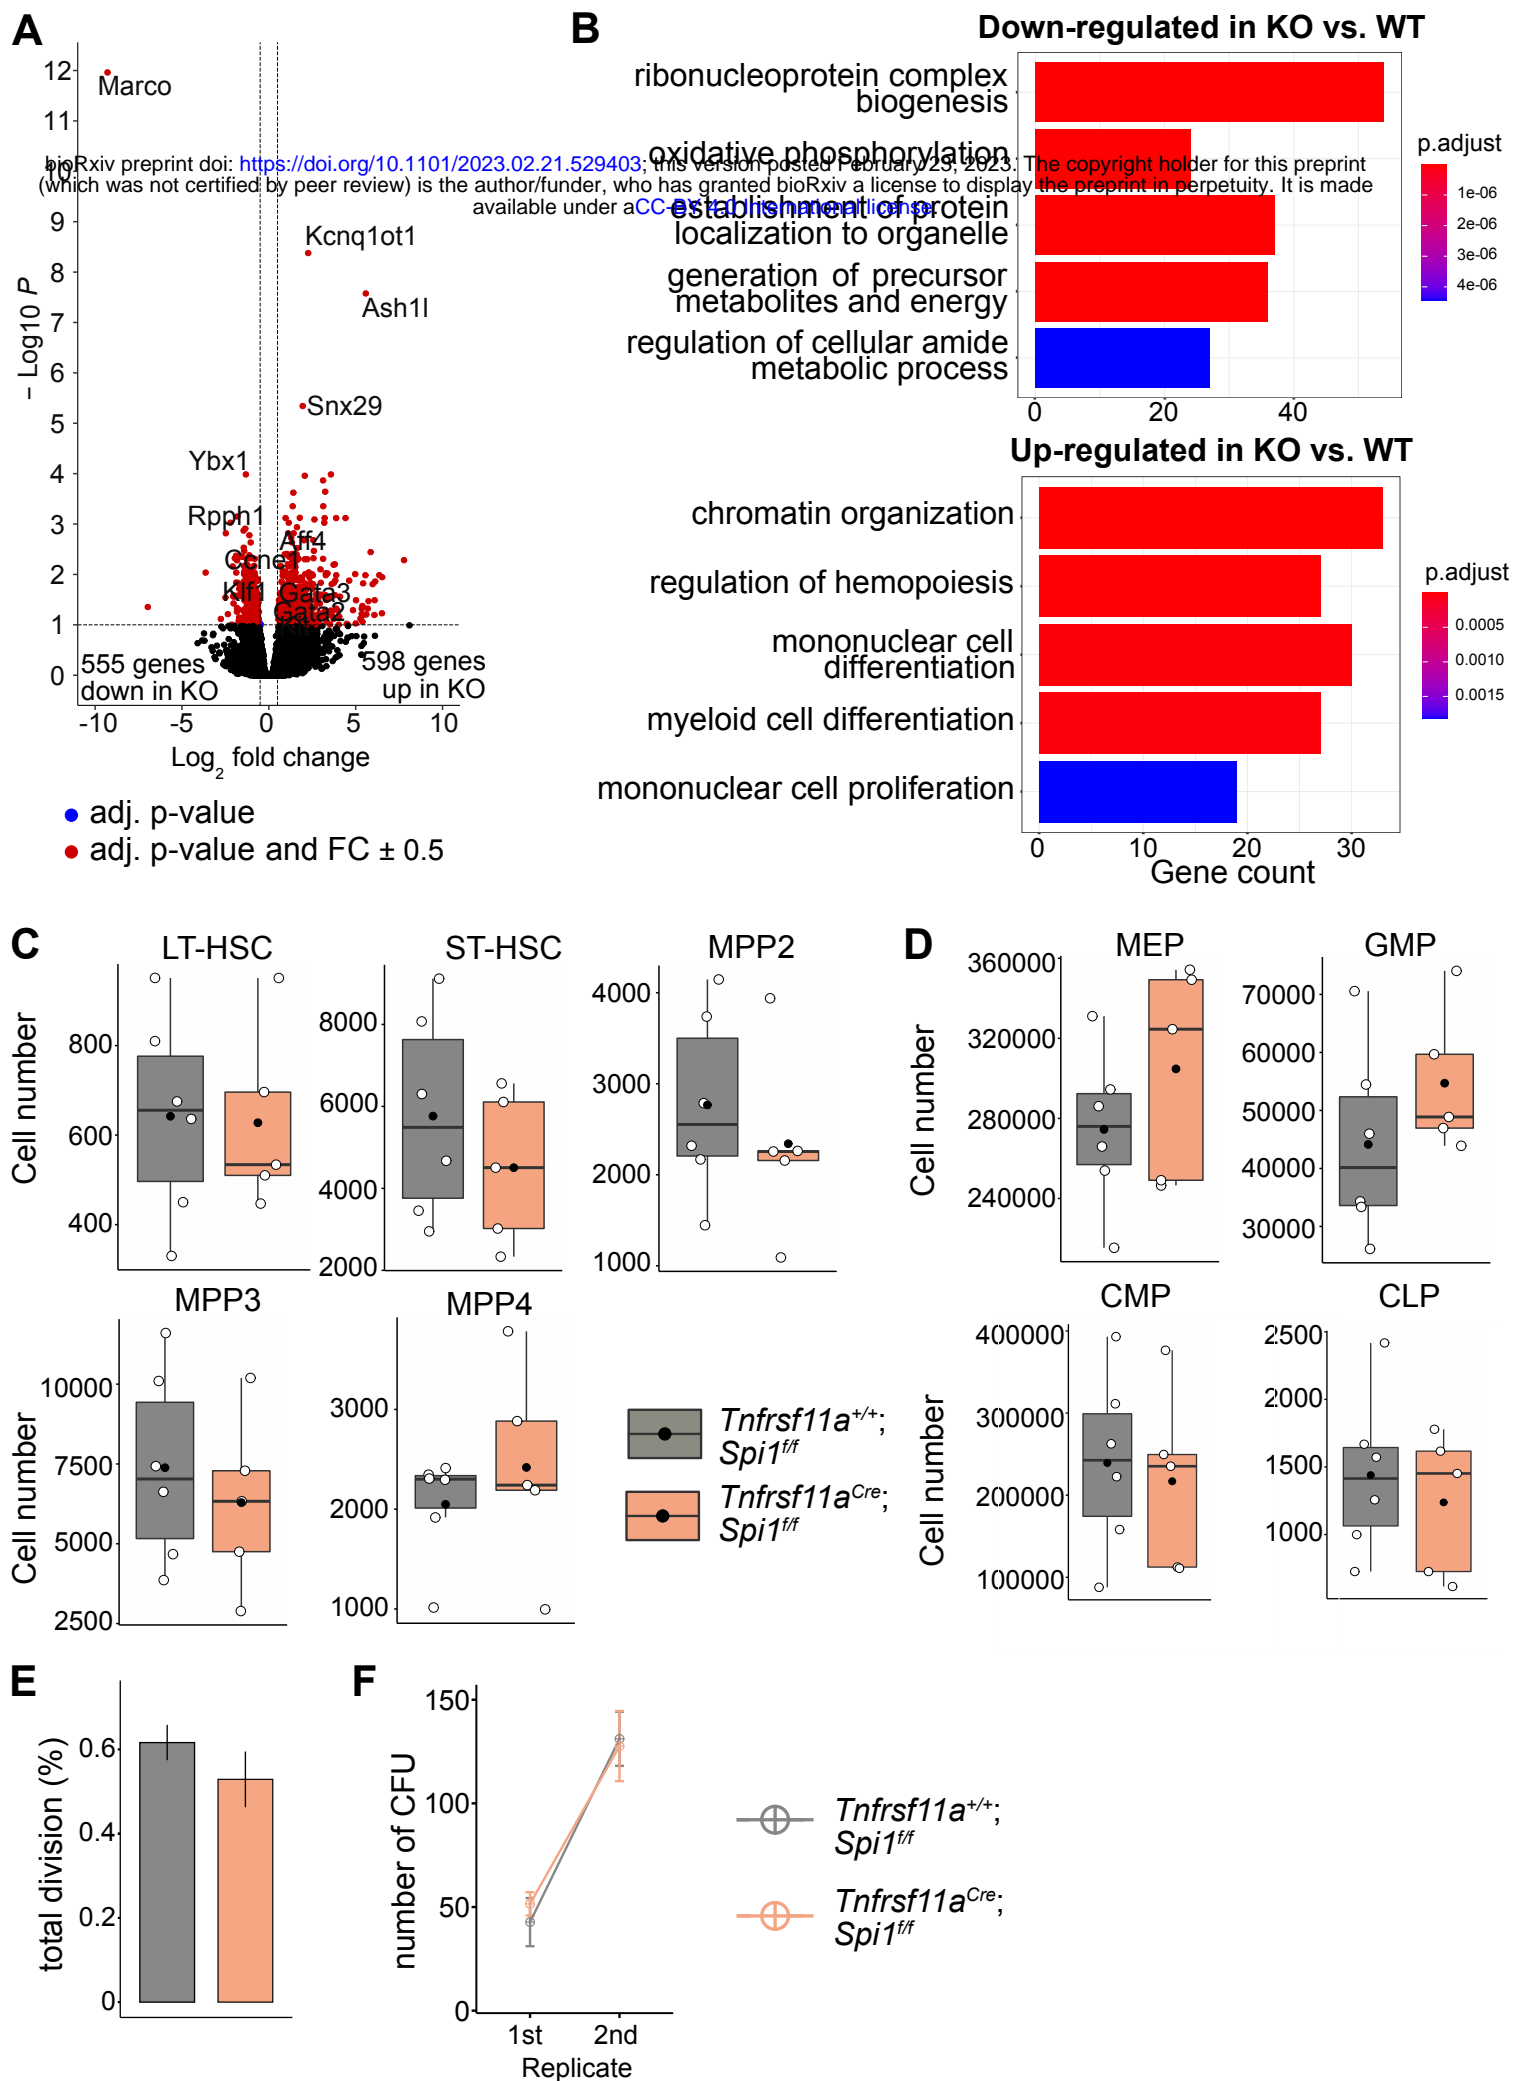

# Figure 6 Kayvanjoo et al.

**A** *Tnfrsf11a*<sup>+/+</sup>; *Spi1*<sup>ff</sup> *Tnfrsf11a*<sup>Cre/+</sup>; *Spi1*<sup>ff</sup>

bioRxiv preprint doi: <https://doi.org/10.1101/2023.02.21.529403>; this version posted February 23, 2023. The copyright holder for this preprint (which was not certified by peer review) is the author/funder, who has granted bioRxiv a license to display the preprint in perpetuity. It is made available under aCC-BY 4.0 International license.

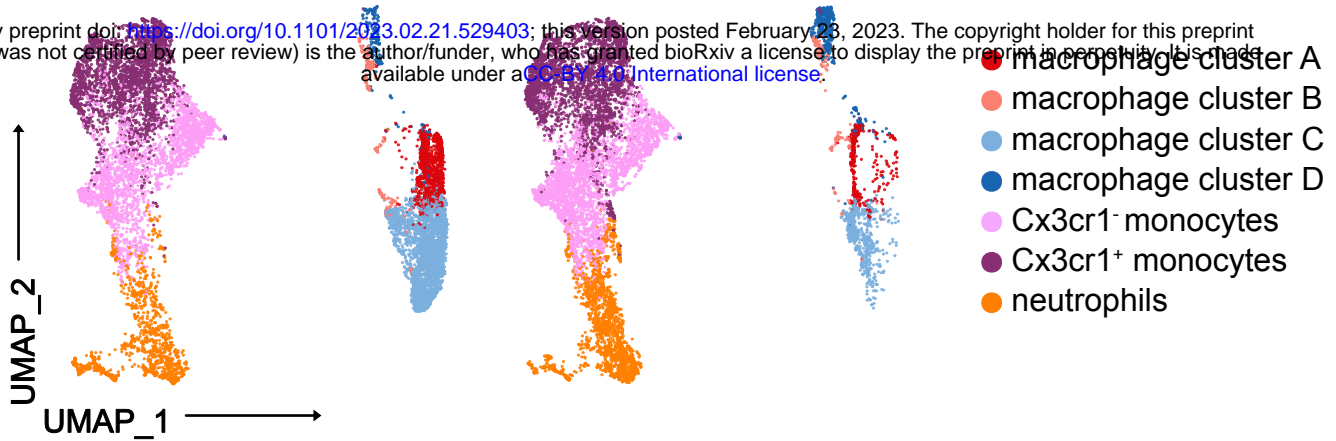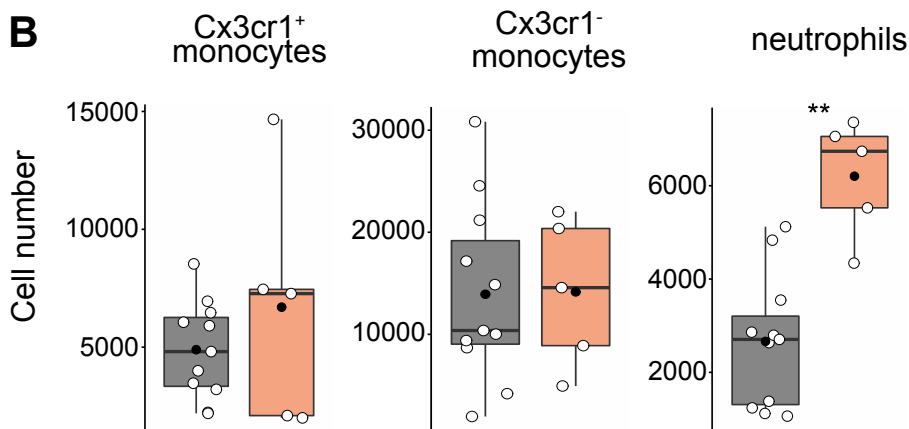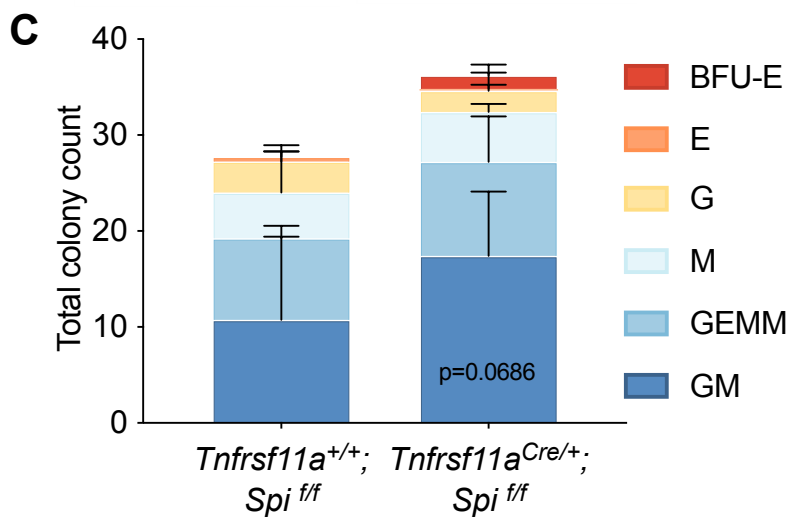

# Figure S1 Kayvanjoo et al.

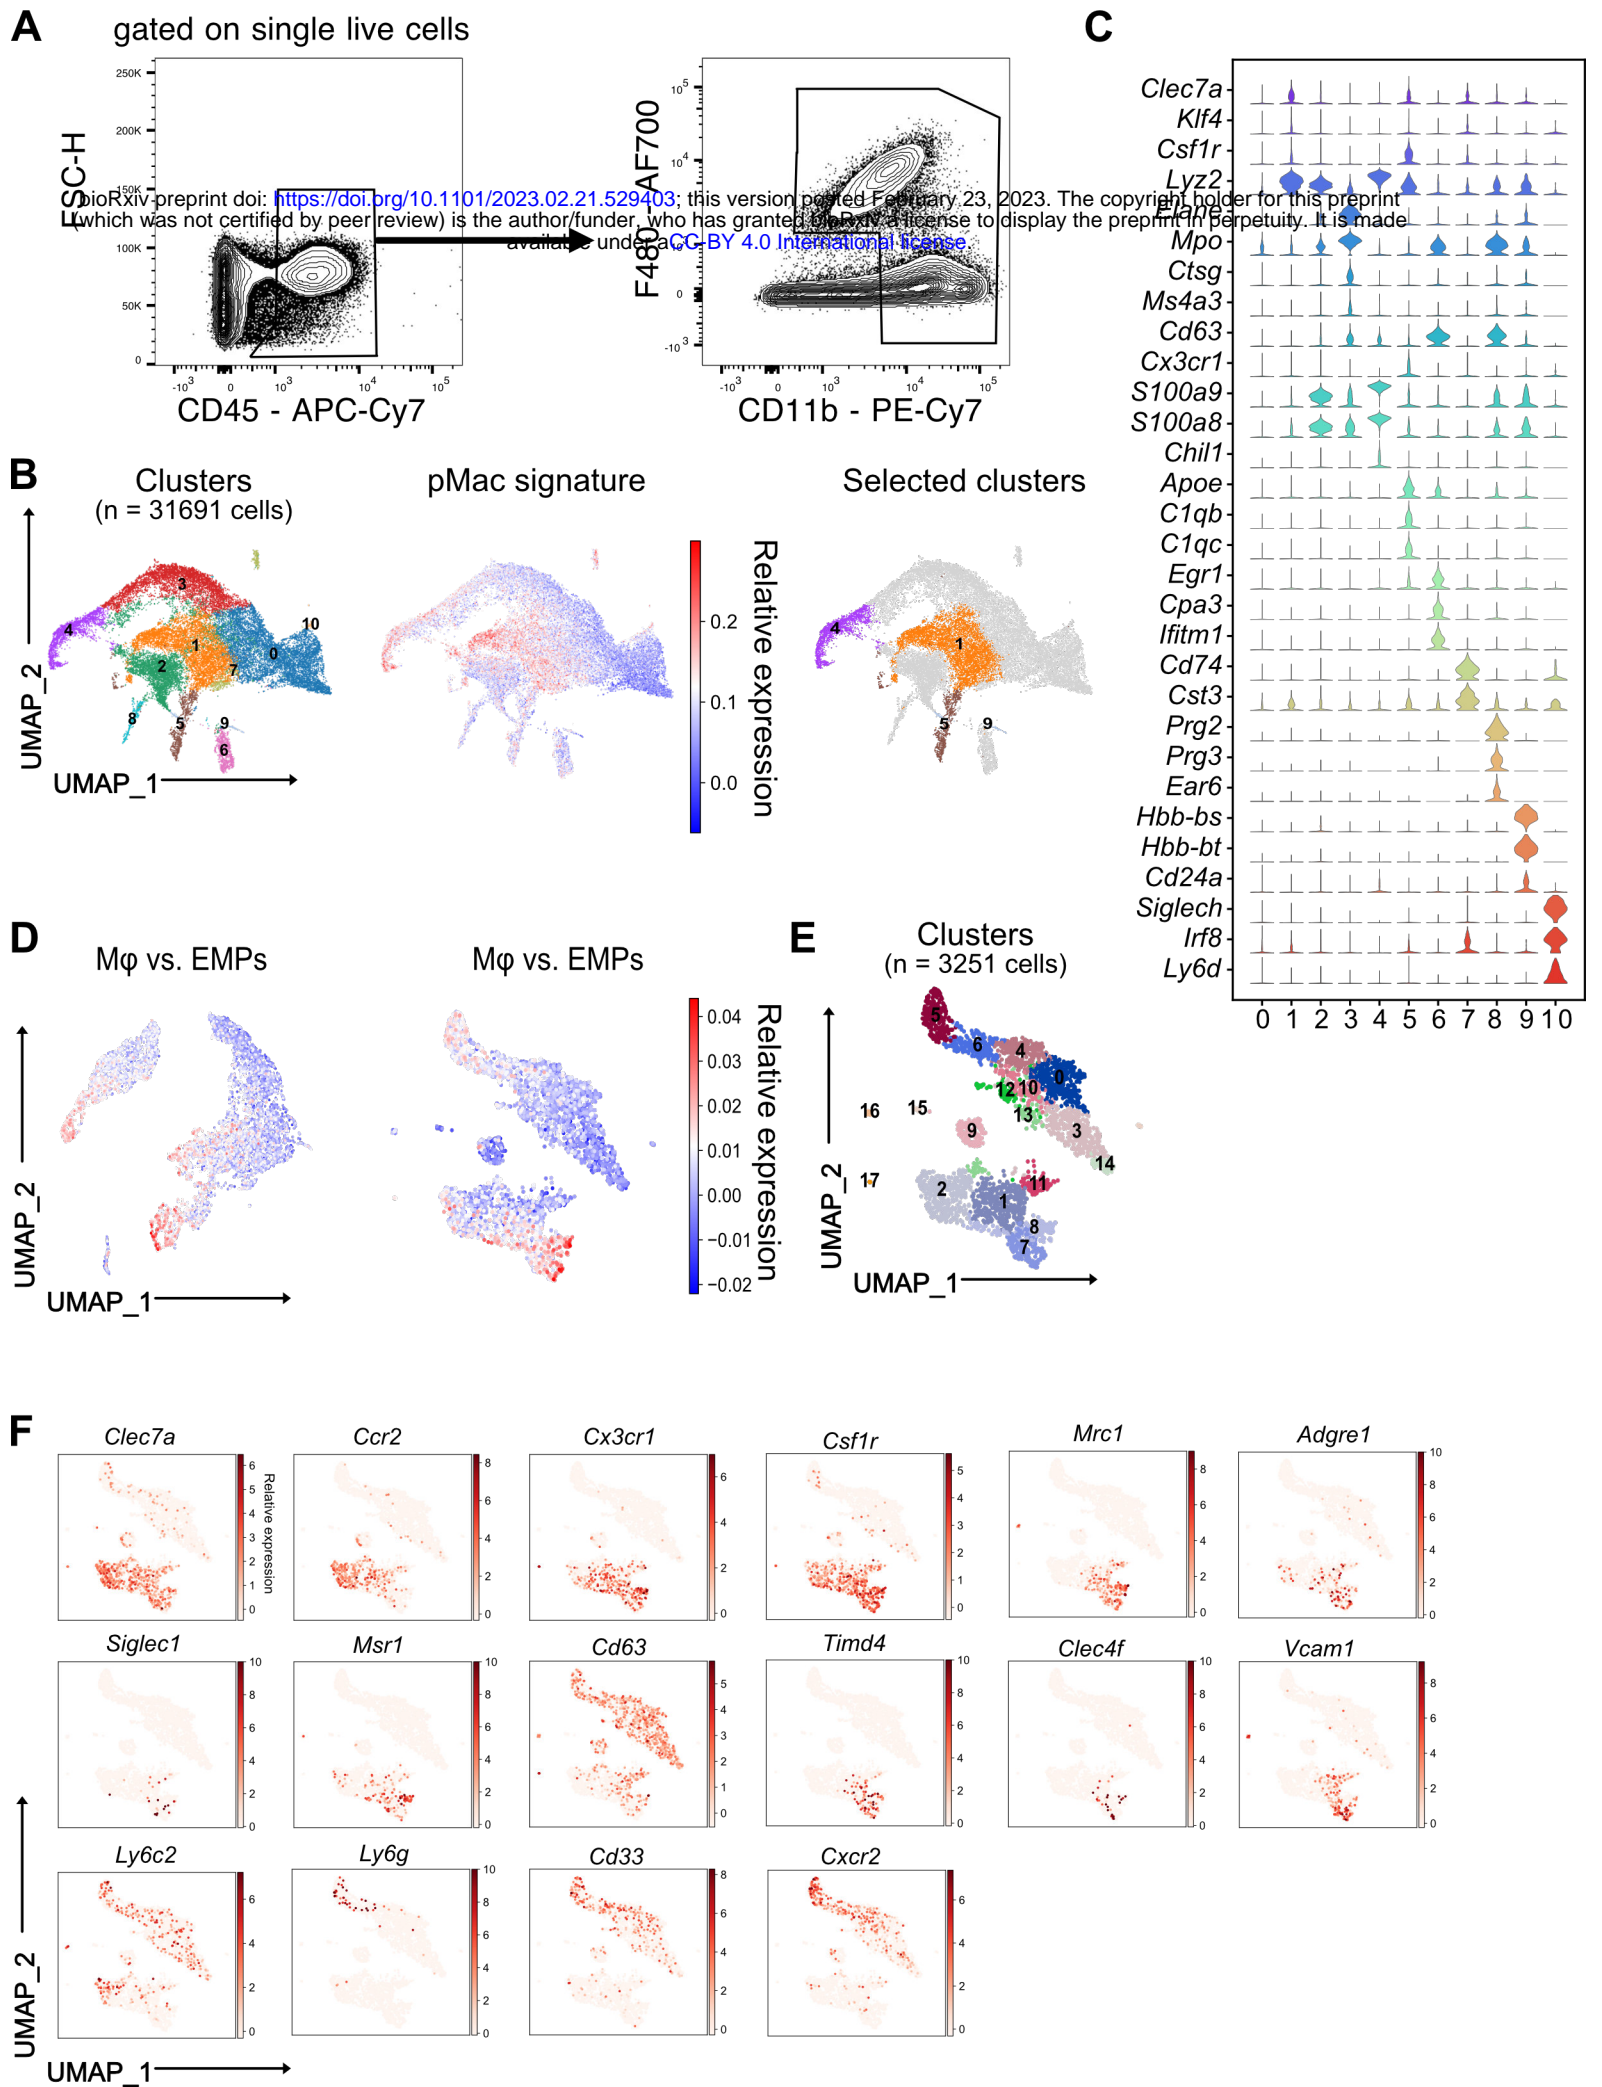

# Figure S2 Kayvanjoo et al.

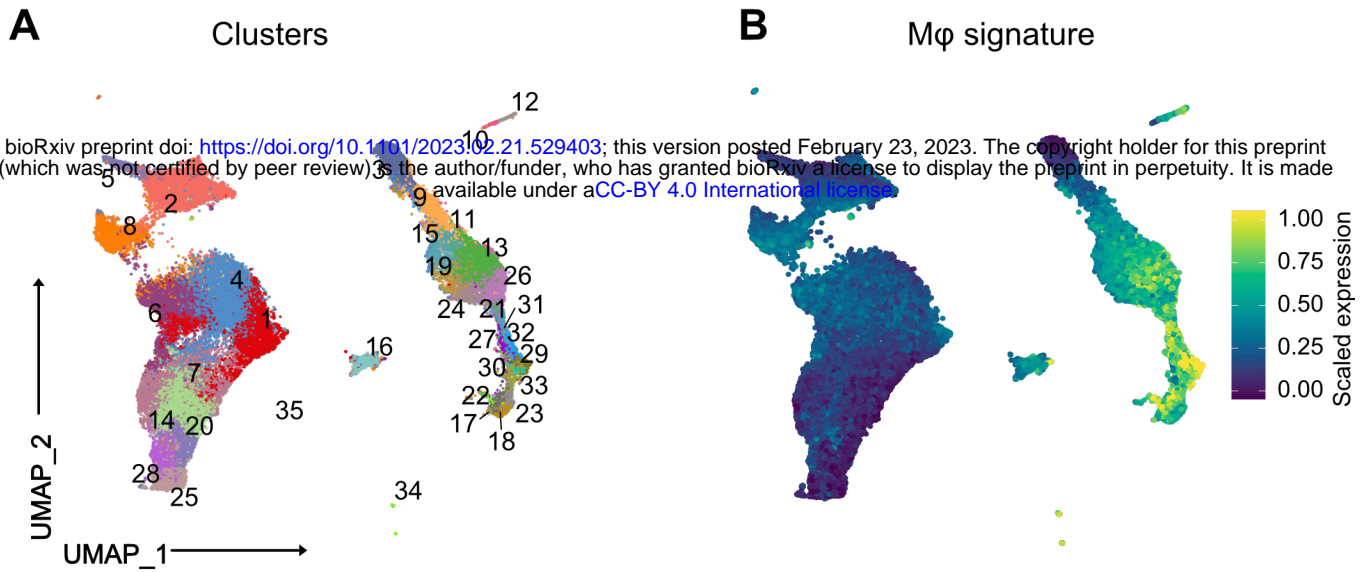

**C**

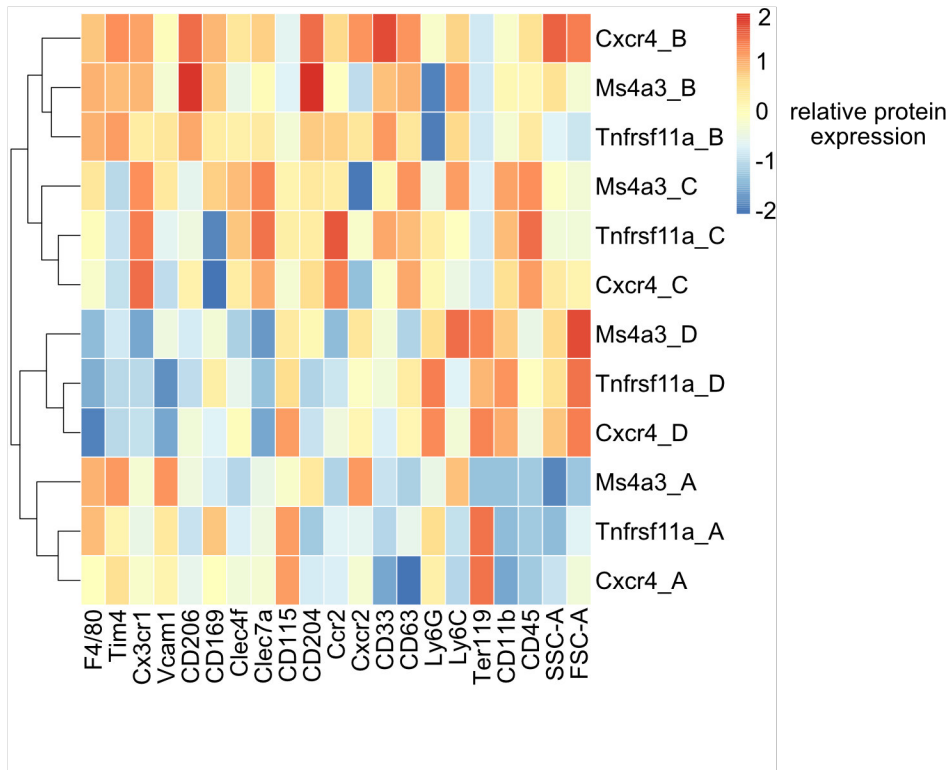



# Figure S3 Kayvanjoo et al.

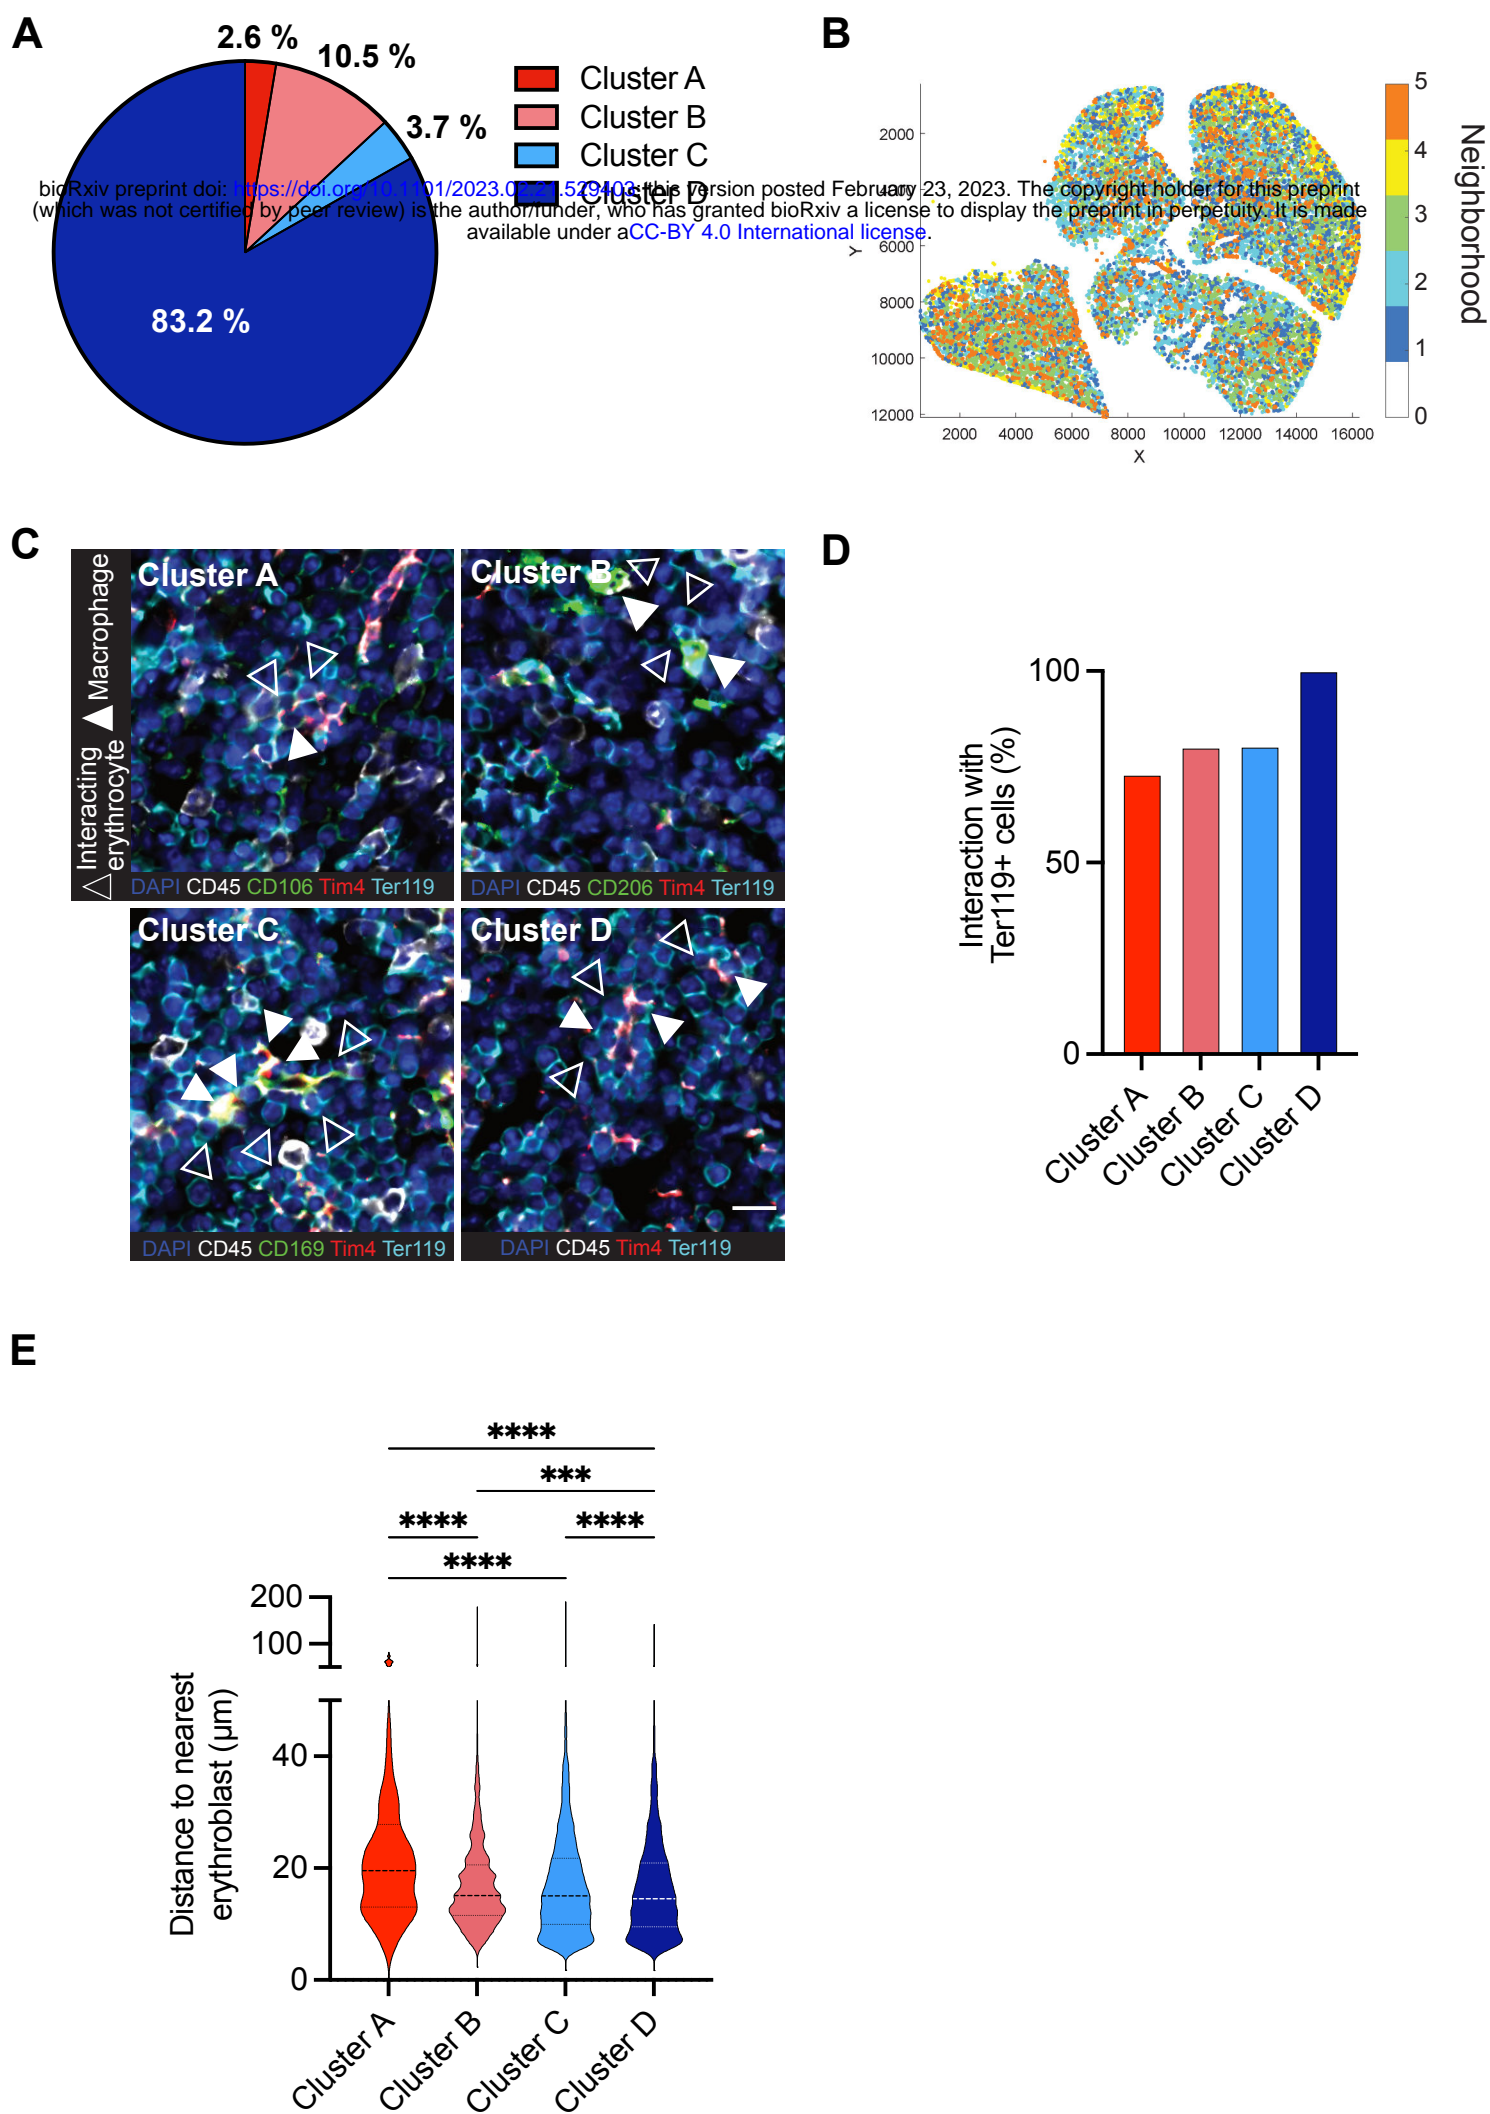

# Figure S4 Kayvanjoo et al.

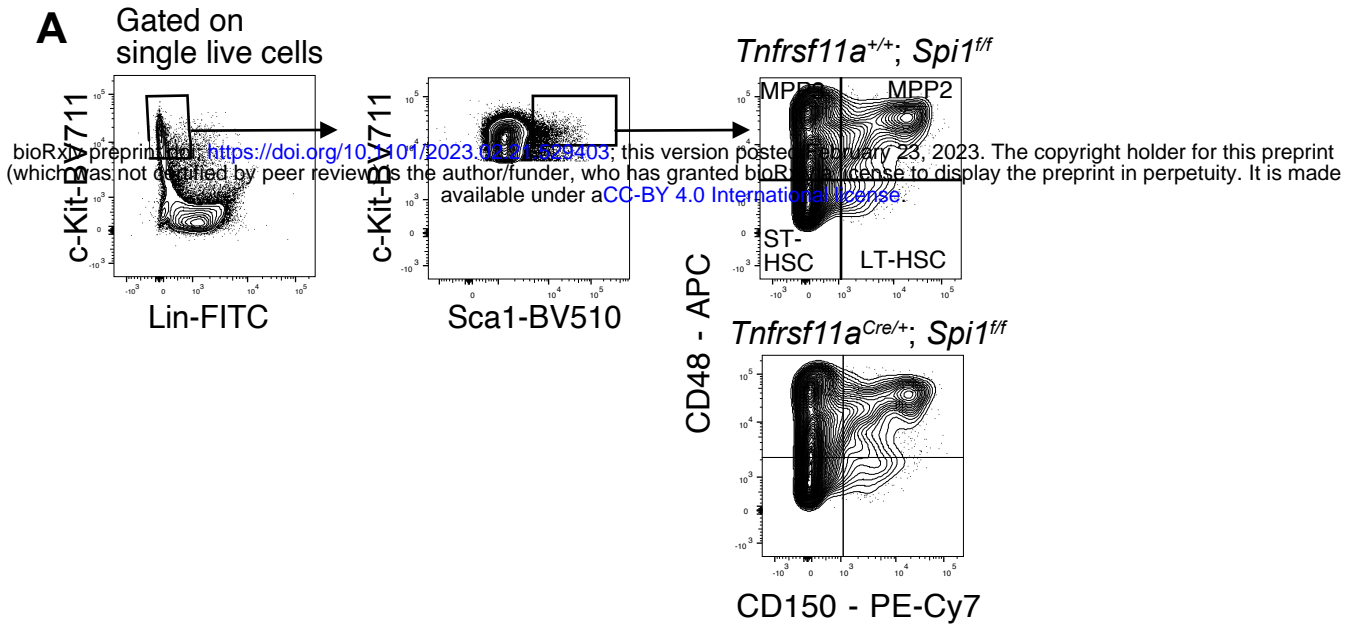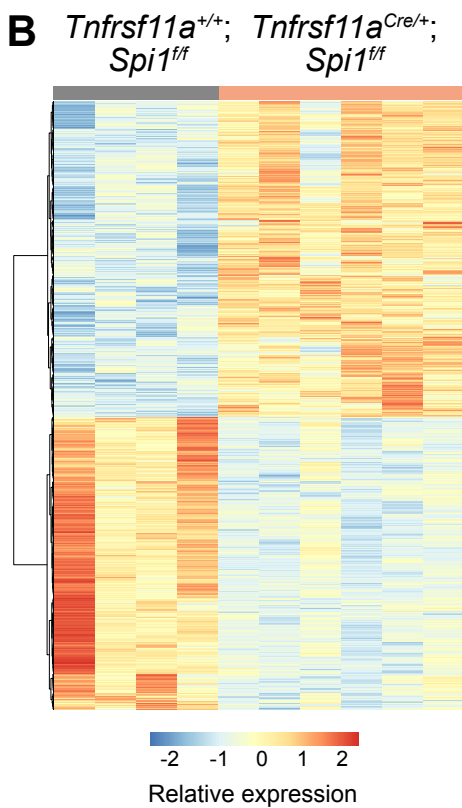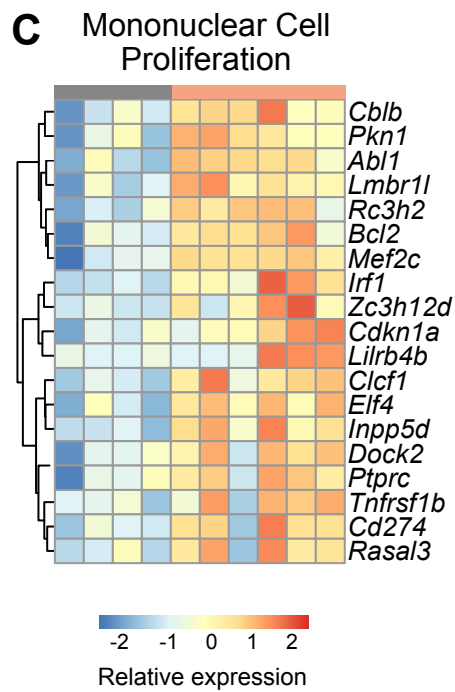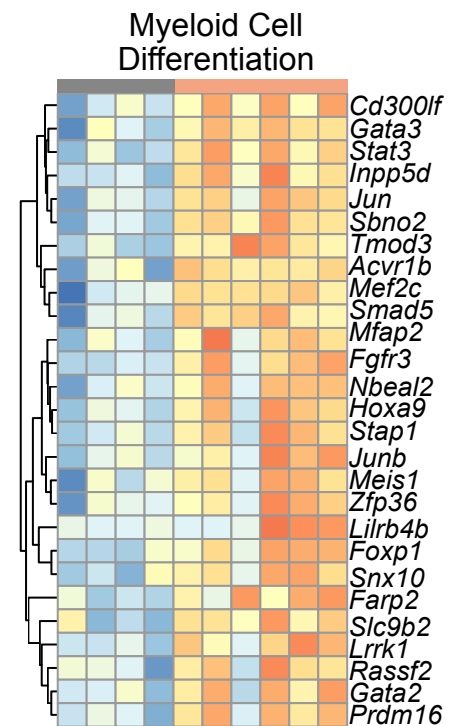

# Figure S5 Kayvanjoo et al.

## A Gated on single live cells

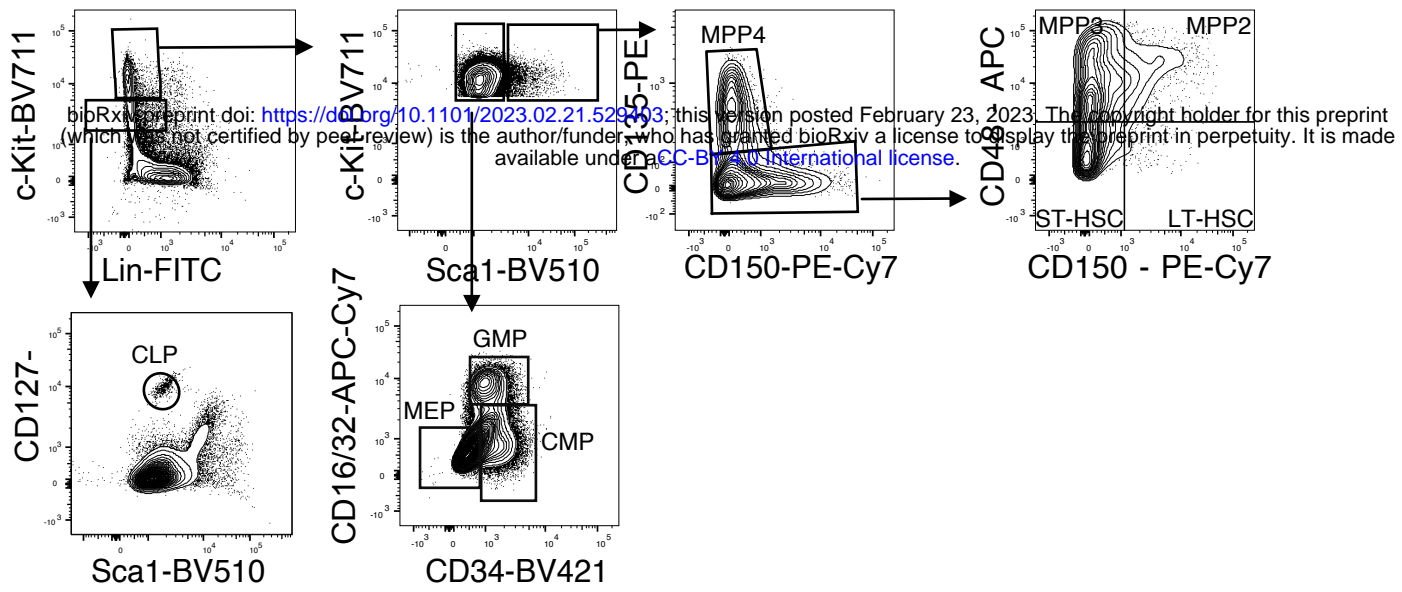

## B Gated on single live cells

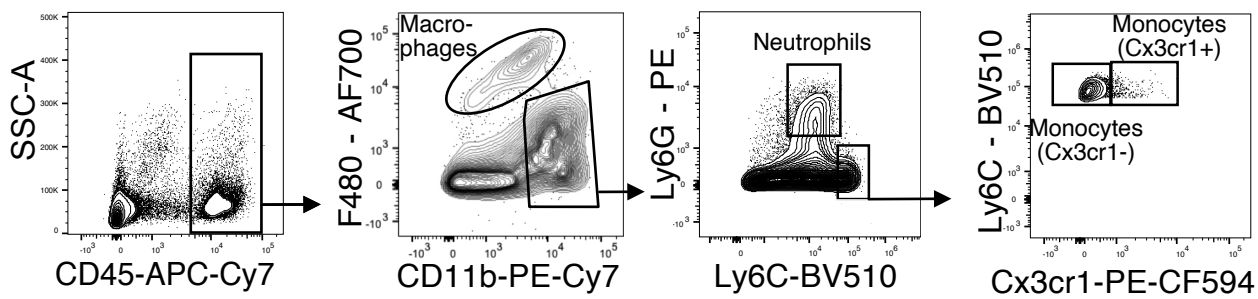

Source: https://www.biorxiv.org/content/biorxiv/early/2023/02/23/2023.02.21.529403.full.pdf
